# Supplementary material for: Identification of mitochondrial-related signature and molecular subtype for the prognosis of osteosarcoma
Source: Aging (Albany NY). 2023 Nov 16;15(22):12794–816. doi: 10.18632/aging.205143 (PMC10713410; doi:10.18632/aging.205143)
Supplement: Supplementary Table 1 [file aging-15-205143-s002.xlsx]

## Sheet: Sheet1
Supplementary Table 1. MRGs list from MitoCarta3.0.
Symbol	MitoCarta3.0_SubMitoLocalization	MitoCarta3.0_MitoPathways
CYC1	MIM	OXPHOS > Complex III > CIII subunits | Metabolism > Metals and cofactors > Heme-containing proteins | Metabolism > Electron carriers > Cytochromes | OXPHOS > OXPHOS subunits
SDHB	MIM	OXPHOS > Complex II > CII subunits | Metabolism > Carbohydrate metabolism > TCA cycle | Metabolism > Metals and cofactors > Fe-S-containing proteins | OXPHOS > OXPHOS subunits
COQ7	MIM	Metabolism > Metals and cofactors > Coenzyme Q metabolism
SDHA	MIM	OXPHOS > Complex II > CII subunits | Metabolism > Carbohydrate metabolism > TCA cycle | OXPHOS > OXPHOS subunits
UQCRC1	MIM	Protein import, sorting and homeostasis > Protein import and sorting > Preprotein cleavage | OXPHOS > Complex III > CIII subunits | OXPHOS > OXPHOS subunits
COQ5	MIM	Metabolism > Metals and cofactors > Coenzyme Q metabolism
PDHA1	Matrix	Metabolism > Carbohydrate metabolism > Pyruvate metabolism
COQ9	MIM	Metabolism > Metals and cofactors > Coenzyme Q metabolism
MRPL12	Matrix	Mitochondrial central dogma > mtRNA metabolism > Transcription | Mitochondrial central dogma > Translation > Mitochondrial ribosome
ATP5F1D	MIM	OXPHOS > Complex V > CV subunits | OXPHOS > OXPHOS subunits
COX5A	MIM	OXPHOS > Complex IV > CIV subunits | OXPHOS > OXPHOS subunits
ISCA2	Matrix	Metabolism > Metals and cofactors > Fe-S cluster biosynthesis | Metabolism > Metals and cofactors > Fe-S-containing proteins
PMPCB	Matrix	Protein import, sorting and homeostasis > Protein import and sorting > Preprotein cleavage | Protein import, sorting and homeostasis > Protein homeostasis > Proteases
UQCRFS1	MIM	OXPHOS > Complex III > CIII subunits | Metabolism > Metals and cofactors > Fe-S-containing proteins | OXPHOS > OXPHOS subunits
ATP5F1A	MIM	OXPHOS > Complex V > CV subunits | OXPHOS > OXPHOS subunits
OGDH	Matrix	Metabolism > Carbohydrate metabolism > TCA cycle
PDHB	Matrix	Metabolism > Carbohydrate metabolism > Pyruvate metabolism
UQCRC2	MIM	Protein import, sorting and homeostasis > Protein import and sorting > Preprotein cleavage | OXPHOS > Complex III > CIII subunits | OXPHOS > OXPHOS subunits
SDHD	MIM	OXPHOS > Complex II > CII subunits | Metabolism > Carbohydrate metabolism > TCA cycle | Metabolism > Metals and cofactors > Heme-containing proteins | OXPHOS > OXPHOS subunits
MRPS35	Matrix	Mitochondrial central dogma > Translation > Mitochondrial ribosome
UQCRQ	MIM	OXPHOS > Complex III > CIII subunits | OXPHOS > OXPHOS subunits
MRPL53	Matrix	Mitochondrial central dogma > Translation > Mitochondrial ribosome
DBT	Matrix	Metabolism > Amino acid metabolism > Branched-chain amino acid metabolism | Metabolism > Amino acid metabolism > Branched-chain amino acid dehydrogenase complex
PDK4	MIM	Metabolism > Carbohydrate metabolism > Pyruvate metabolism
MDH2	Matrix	Metabolism > Carbohydrate metabolism > Gluconeogenesis | Metabolism > Carbohydrate metabolism > Malate-aspartate shuttle | Metabolism > Carbohydrate metabolism > TCA cycle
MRPS27	Matrix	Mitochondrial central dogma > Translation > Mitochondrial ribosome
CS	Matrix	Metabolism > Carbohydrate metabolism > TCA cycle
GRPEL1	Matrix	Protein import, sorting and homeostasis > Protein import and sorting > Import motor | Metabolism > Metals and cofactors > Fe-S cluster biosynthesis
DLAT	Matrix	Metabolism > Carbohydrate metabolism > Pyruvate metabolism
LRPPRC	Matrix	Mitochondrial central dogma > mtRNA metabolism > mtRNA stability and decay | Mitochondrial central dogma > Translation
DLST	Matrix	Metabolism > Carbohydrate metabolism > TCA cycle | Metabolism > Amino acid metabolism > Lysine metabolism
PDHX	Matrix	Metabolism > Carbohydrate metabolism > Pyruvate metabolism
GFM1	Matrix	Mitochondrial central dogma > Translation > Translation factors
MPC2	MIM	Metabolism > Carbohydrate metabolism > Gluconeogenesis | Metabolism > Carbohydrate metabolism > Pyruvate metabolism | Metabolism > Carbohydrate metabolism > TCA-associated | Small molecule transport
NDUFS1	MIM	OXPHOS > Complex I > CI subunits | Metabolism > Metals and cofactors > Fe-S-containing proteins | OXPHOS > OXPHOS subunits
MRPL46	Matrix	Mitochondrial central dogma > Translation > Mitochondrial ribosome
ATP5F1E	MIM	OXPHOS > Complex V > CV subunits | OXPHOS > OXPHOS subunits
SLC25A3	MIM	Metabolism > Metals and cofactors > Copper metabolism | Signaling > Calcium homeostasis > Calcium cycle | Small molecule transport > SLC25A family
MRPS23	Matrix	Mitochondrial central dogma > Translation > Mitochondrial ribosome
FH	Matrix	Metabolism > Carbohydrate metabolism > TCA cycle
PMPCA	Matrix	Protein import, sorting and homeostasis > Protein import and sorting > Preprotein cleavage | Protein import, sorting and homeostasis > Protein homeostasis > Proteases
ATP5F1B	MIM	OXPHOS > Complex V > CV subunits | OXPHOS > OXPHOS subunits
SDHAF4	Matrix	OXPHOS > Complex II > CII assembly factors | OXPHOS > OXPHOS assembly factors
UQCR10	MIM	OXPHOS > Complex III > CIII subunits | OXPHOS > OXPHOS subunits
ISCA1	Matrix	Metabolism > Metals and cofactors > Fe-S cluster biosynthesis | Metabolism > Metals and cofactors > Fe-S-containing proteins
SUCLA2	Matrix	Metabolism > Carbohydrate metabolism > TCA cycle | Metabolism > Carbohydrate metabolism > Itaconate metabolism | Metabolism > Nucleotide metabolism > Nucleotide synthesis and processing
COQ3	MIM	Metabolism > Metals and cofactors > Coenzyme Q metabolism
IARS2	Matrix	Mitochondrial central dogma > Translation > mt-tRNA synthetases
MRPS15	Matrix	Mitochondrial central dogma > Translation > Mitochondrial ribosome
IDH3A	Matrix	Metabolism > Carbohydrate metabolism > TCA cycle
COX11	MIM	OXPHOS > Complex IV > CIV assembly factors | Metabolism > Metals and cofactors > Copper metabolism | OXPHOS > OXPHOS assembly factors
ETFDH	MIM	Metabolism > Lipid metabolism > Fatty acid oxidation | Metabolism > Amino acid metabolism > Branched-chain amino acid metabolism | Metabolism > Amino acid metabolism > Lysine metabolism | Metabolism > Amino acid metabolism > Glycine metabolism | Metabolism > Metals and cofactors > Fe-S-containing proteins | Metabolism > Vitamin metabolism > Choline and betaine metabolism | Metabolism > Electron c…
TIMM10	MIM	Protein import, sorting and homeostasis > Protein homeostasis > Chaperones | Protein import, sorting and homeostasis > Protein import and sorting
MRPL34	Matrix	Mitochondrial central dogma > Translation > Mitochondrial ribosome
MRPL2	Matrix	Mitochondrial central dogma > Translation > Mitochondrial ribosome
BCKDHA	MIM	Metabolism > Amino acid metabolism > Branched-chain amino acid metabolism | Metabolism > Amino acid metabolism > Branched-chain amino acid dehydrogenase complex
UQCRH	MIM	OXPHOS > Complex III > CIII subunits | OXPHOS > OXPHOS subunits
HIGD2A	MIM	OXPHOS > OXPHOS assembly factors | OXPHOS > Respirasome assembly
ATP5PO	MIM	OXPHOS > Complex V > CV subunits | OXPHOS > OXPHOS subunits
ECHS1	Matrix	Metabolism > Lipid metabolism > Fatty acid oxidation | Metabolism > Amino acid metabolism > Branched-chain amino acid metabolism | Metabolism > Amino acid metabolism > Lysine metabolism
LETMD1	Membrane	Small molecule transport
COX6A1	MIM	OXPHOS > Complex IV > CIV subunits | OXPHOS > OXPHOS subunits
COX15	MIM	OXPHOS > Complex IV > CIV assembly factors | Metabolism > Metals and cofactors > Heme synthesis and processing | OXPHOS > OXPHOS assembly factors
AFG3L2	MIM	Protein import, sorting and homeostasis > Protein homeostasis > Proteases
HADHA	MIM	Metabolism > Lipid metabolism > Fatty acid oxidation | Metabolism > Lipid metabolism > Cardiolipin synthesis | Metabolism > Amino acid metabolism > Branched-chain amino acid metabolism
ETFA	Matrix	Metabolism > Lipid metabolism > Fatty acid oxidation | Metabolism > Amino acid metabolism > Branched-chain amino acid metabolism | Metabolism > Amino acid metabolism > Lysine metabolism | Metabolism > Amino acid metabolism > Glycine metabolism | Metabolism > Vitamin metabolism > Choline and betaine metabolism | Metabolism > Electron carriers > Q-linked reactions, other
NDUFS7	MIM	OXPHOS > Complex I > CI subunits | Metabolism > Metals and cofactors > Fe-S-containing proteins | OXPHOS > OXPHOS subunits
CPT2	MIM	Metabolism > Lipid metabolism > Fatty acid oxidation | Metabolism > Metals and cofactors > Carnitine synthesis and transport | Metabolism > Metals and cofactors > Carnitine shuttle
BCKDHB	MIM	Metabolism > Amino acid metabolism > Branched-chain amino acid metabolism | Metabolism > Amino acid metabolism > Branched-chain amino acid dehydrogenase complex
IDH3B	Matrix	Metabolism > Carbohydrate metabolism > TCA cycle
LARS2	Matrix	Mitochondrial central dogma > Translation > mt-tRNA synthetases
ACADS	Matrix	Metabolism > Lipid metabolism > Fatty acid oxidation
LETM1	MIM	Signaling > Calcium homeostasis > Calcium cycle
ATP5ME	MIM	OXPHOS > Complex V > CV subunits | OXPHOS > OXPHOS subunits | Mitochondrial dynamics and surveillance > Cristae formation
OPA1	MIM	Mitochondrial dynamics and surveillance > Fusion | Mitochondrial dynamics and surveillance > Cristae formation
AUH	Matrix	Metabolism > Carbohydrate metabolism > Itaconate metabolism | Metabolism > Amino acid metabolism > Branched-chain amino acid metabolism
SUCLG1	Matrix	Metabolism > Carbohydrate metabolism > TCA cycle | Metabolism > Carbohydrate metabolism > Itaconate metabolism | Metabolism > Nucleotide metabolism > Nucleotide synthesis and processing
NDUFV2	MIM	OXPHOS > Complex I > CI subunits | Metabolism > Metals and cofactors > Fe-S-containing proteins | OXPHOS > OXPHOS subunits
COQ6	MIM	Metabolism > Metals and cofactors > Coenzyme Q metabolism
MRPL43	Matrix	Mitochondrial central dogma > Translation > Mitochondrial ribosome
ABHD11	Matrix	Metabolism > Carbohydrate metabolism > TCA-associated
ATP5PF	MIM	OXPHOS > Complex V > CV subunits | OXPHOS > OXPHOS subunits
NDUFB8	MIM	OXPHOS > Complex I > CI subunits | OXPHOS > OXPHOS subunits
LONP1	Matrix	Protein import, sorting and homeostasis > Protein homeostasis > Proteases
DLD	Matrix	Metabolism > Carbohydrate metabolism > Pyruvate metabolism | Metabolism > Carbohydrate metabolism > TCA cycle | Metabolism > Amino acid metabolism > Branched-chain amino acid metabolism | Metabolism > Amino acid metabolism > Branched-chain amino acid dehydrogenase complex | Metabolism > Amino acid metabolism > Lysine metabolism | Metabolism > Amino acid metabolism > Glycine metabolism | Metabolis…
AIFM1	MIM	Protein import, sorting and homeostasis > Protein import and sorting > MIA40 | OXPHOS > Complex I > CI assembly factors | OXPHOS > OXPHOS assembly factors | Mitochondrial dynamics and surveillance > Apoptosis
ECHDC3	Matrix	0
APOOL	MIM	Mitochondrial dynamics and surveillance > Cristae formation > MICOS complex
MRPL10	Matrix	Mitochondrial central dogma > Translation > Mitochondrial ribosome
MRRF	Matrix	Mitochondrial central dogma > Translation > Translation factors
NDUFS8	MIM	OXPHOS > Complex I > CI subunits | Metabolism > Metals and cofactors > Fe-S-containing proteins | OXPHOS > OXPHOS subunits
ACADM	Matrix	Metabolism > Lipid metabolism > Fatty acid oxidation
IMMT	MIM	Mitochondrial dynamics and surveillance > Cristae formation > MICOS complex
TIMM9	MIM	Protein import, sorting and homeostasis > Protein homeostasis > Chaperones | Protein import, sorting and homeostasis > Protein import and sorting
SLC25A4	MIM	Metabolism > Nucleotide metabolism > Nucleotide import | Signaling > Calcium homeostasis > Mitochondrial permeability transition pore | Small molecule transport > SLC25A family
SAMM50	MOM	Protein import, sorting and homeostasis > Protein import and sorting > SAM | Mitochondrial dynamics and surveillance > Intramitochondrial membrane interactions
NDUFS2	MIM	OXPHOS > Complex I > CI subunits | Metabolism > Metals and cofactors > Fe-S-containing proteins | OXPHOS > OXPHOS subunits
NDUFV1	MIM	OXPHOS > Complex I > CI subunits | Metabolism > Metals and cofactors > Fe-S-containing proteins | OXPHOS > OXPHOS subunits
ACO2	Matrix	Metabolism > Carbohydrate metabolism > TCA cycle | Metabolism > Metals and cofactors > Fe-S-containing proteins
SUPV3L1	Matrix	Mitochondrial central dogma > mtRNA metabolism > mtRNA granules | Mitochondrial central dogma > mtRNA metabolism > mtRNA stability and decay
FECH	MIM	Metabolism > Metals and cofactors > Heme synthesis and processing | Metabolism > Metals and cofactors > Fe-S-containing proteins
MTIF2	Matrix	Mitochondrial central dogma > Translation > Translation factors
PHB	MIM	Protein import, sorting and homeostasis > Protein homeostasis > Chaperones
HIBCH	Matrix	Metabolism > Amino acid metabolism > Branched-chain amino acid metabolism
MRPS2	Matrix	Mitochondrial central dogma > Translation > Mitochondrial ribosome
HSPA9	Matrix	Metabolism > Metals and cofactors > Fe-S cluster biosynthesis
SURF1	MIM	OXPHOS > Complex IV > CIV assembly factors | OXPHOS > OXPHOS assembly factors
PRDX3	Matrix	Metabolism > Detoxification > ROS and glutathione metabolism
GHITM	MIM	Mitochondrial dynamics and surveillance > Apoptosis
GUF1	Matrix	Mitochondrial central dogma > Translation
TIMM13	MIM	Protein import, sorting and homeostasis > Protein homeostasis > Chaperones | Protein import, sorting and homeostasis > Protein import and sorting
LYRM4	Matrix	Metabolism > Metals and cofactors > Fe-S cluster biosynthesis
MRPL16	Matrix	Mitochondrial central dogma > Translation > Mitochondrial ribosome
MRPL40	Matrix	Mitochondrial central dogma > Translation > Mitochondrial ribosome
IDH3G	Matrix	Metabolism > Carbohydrate metabolism > TCA cycle
SDHC	MIM	OXPHOS > Complex II > CII subunits | Metabolism > Carbohydrate metabolism > TCA cycle | Metabolism > Metals and cofactors > Heme-containing proteins | OXPHOS > OXPHOS subunits
NDUFB5	MIM	OXPHOS > Complex I > CI subunits | OXPHOS > OXPHOS subunits
SDHAF2	Matrix	OXPHOS > Complex II > CII assembly factors | OXPHOS > OXPHOS assembly factors
COQ10A	MIM	Metabolism > Metals and cofactors > Coenzyme Q metabolism
GATD3A	Matrix	0
TXN2	Matrix	Metabolism > Vitamin metabolism > Vitamin C metabolism | Metabolism > Detoxification > ROS and glutathione metabolism
MRPS18A	Matrix	Mitochondrial central dogma > Translation > Mitochondrial ribosome
COX6C	MIM	OXPHOS > Complex IV > CIV subunits | OXPHOS > OXPHOS subunits
NDUFB9	MIM	OXPHOS > Complex I > CI subunits | OXPHOS > OXPHOS subunits
MTCH2	MOM	Small molecule transport > SLC25A family | Mitochondrial dynamics and surveillance > Fusion
NDUFA6	MIM	OXPHOS > Complex I > CI subunits | OXPHOS > OXPHOS subunits
SLC25A20	MIM	Metabolism > Lipid metabolism > Fatty acid oxidation | Metabolism > Metals and cofactors > Carnitine synthesis and transport | Metabolism > Metals and cofactors > Carnitine shuttle | Small molecule transport > SLC25A family
MRPL1	Matrix	Mitochondrial central dogma > Translation > Mitochondrial ribosome
TIMM44	MIM	Protein import, sorting and homeostasis > Protein import and sorting > Import motor
COX17	IMS	OXPHOS > Complex IV > CIV assembly factors | Metabolism > Metals and cofactors > Copper metabolism | OXPHOS > OXPHOS assembly factors
MICOS10	MIM	Mitochondrial dynamics and surveillance > Cristae formation > MICOS complex
SOD2	Matrix	Metabolism > Detoxification > ROS and glutathione metabolism
COX6B1	MIM	OXPHOS > Complex IV > CIV subunits | OXPHOS > OXPHOS subunits
VDAC1	MOM	Signaling > Calcium homeostasis > Mitochondrial permeability transition pore | Mitochondrial dynamics and surveillance > Organelle contact sites | Small molecule transport
CLPP	Matrix	Protein import, sorting and homeostasis > Protein homeostasis > Proteases
HADH	Matrix	Metabolism > Lipid metabolism > Fatty acid oxidation | Metabolism > Amino acid metabolism > Lysine metabolism
ACADL	MIM	Metabolism > Lipid metabolism > Fatty acid oxidation
ACAT1	Matrix	Metabolism > Carbohydrate metabolism > Ketone metabolism | Metabolism > Lipid metabolism > Fatty acid oxidation | Metabolism > Amino acid metabolism > Branched-chain amino acid metabolism | Metabolism > Amino acid metabolism > Lysine metabolism
MALSU1	Matrix	Mitochondrial central dogma > Translation > Mitochondrial ribosome assembly
CLPX	Matrix	Protein import, sorting and homeostasis > Protein homeostasis > Proteases
NDUFS4	MIM	OXPHOS > Complex I > CI subunits | OXPHOS > OXPHOS subunits
MRPL4	Matrix	Mitochondrial central dogma > Translation > Mitochondrial ribosome
C1QBP	Matrix	Signaling > Immune response
PITRM1	Matrix	Protein import, sorting and homeostasis > Protein homeostasis > Proteases
UQCC1	MIM	OXPHOS > Complex III > CIII assembly factors | OXPHOS > OXPHOS assembly factors
MRPL55	Matrix	Mitochondrial central dogma > Translation > Mitochondrial ribosome
MRM1	Matrix	Mitochondrial central dogma > mtRNA metabolism > mtRNA granules | Mitochondrial central dogma > mtRNA metabolism > mt-rRNA modifications
MECR	Matrix	Metabolism > Lipid metabolism > Type II fatty acid synthesis
MRPL44	Matrix	Mitochondrial central dogma > Translation > Mitochondrial ribosome
HSDL2	Matrix	0
MRPS14	Matrix	Mitochondrial central dogma > Translation > Mitochondrial ribosome
ABCB8	MIM	Small molecule transport > ABC transporters
ATPAF2	Matrix	OXPHOS > Complex V > CV assembly factors | OXPHOS > OXPHOS assembly factors
NDUFA9	MIM	OXPHOS > Complex I > CI subunits | OXPHOS > OXPHOS subunits
COA6	IMS	OXPHOS > Complex IV > CIV assembly factors | OXPHOS > OXPHOS assembly factors
POLRMT	Matrix	Mitochondrial central dogma > mtDNA maintenance > mtDNA replication | Mitochondrial central dogma > mtDNA maintenance > mtDNA nucleoid | Mitochondrial central dogma > mtRNA metabolism > Transcription
ISCU	Matrix	Metabolism > Metals and cofactors > Fe-S cluster biosynthesis | Metabolism > Metals and cofactors > Fe-S-containing proteins
RTN4IP1	Matrix	0
OGDHL	Matrix	Metabolism > Carbohydrate metabolism > TCA cycle
ATP5F1C	MIM	OXPHOS > Complex V > CV subunits | OXPHOS > OXPHOS subunits
BCKDK	Matrix	Metabolism > Amino acid metabolism > Branched-chain amino acid metabolism | Metabolism > Amino acid metabolism > Branched-chain amino acid dehydrogenase complex
GFM2	Matrix	Mitochondrial central dogma > Translation > Translation factors
NDUFAF4	MIM	OXPHOS > Complex I > CI assembly factors | OXPHOS > OXPHOS assembly factors
SLC25A35	MIM	Small molecule transport > SLC25A family
SLC25A11	MIM	Metabolism > Carbohydrate metabolism > Gluconeogenesis | Metabolism > Carbohydrate metabolism > Malate-aspartate shuttle | Metabolism > Carbohydrate metabolism > TCA-associated | Small molecule transport > SLC25A family
TIMM8B	MIM	Protein import, sorting and homeostasis > Protein homeostasis > Chaperones | Protein import, sorting and homeostasis > Protein import and sorting
MCAT	Matrix	Metabolism > Lipid metabolism > Type II fatty acid synthesis
IBA57	Matrix	Metabolism > Metals and cofactors > Fe-S cluster biosynthesis
PHB2	MIM	Protein import, sorting and homeostasis > Protein homeostasis > Chaperones
DAP3	Matrix	Mitochondrial central dogma > Translation > Mitochondrial ribosome
CMC2	IMS	OXPHOS > Complex IV > CIV assembly factors | OXPHOS > OXPHOS assembly factors
SDHAF1	Matrix	OXPHOS > Complex II > CII assembly factors | OXPHOS > OXPHOS assembly factors
MRPS17	Matrix	Mitochondrial central dogma > Translation > Mitochondrial ribosome
ADHFE1	Matrix	Metabolism > Amino acid metabolism > GABA metabolism
NFS1	Matrix	Metabolism > Metals and cofactors > Fe-S cluster biosynthesis | Metabolism > Metals and cofactors > Fe-S-containing proteins
NDUFAF5	MIM	OXPHOS > Complex I > CI assembly factors | OXPHOS > OXPHOS assembly factors
MRPL17	Matrix	Mitochondrial central dogma > Translation > Mitochondrial ribosome
TACO1	Matrix	Mitochondrial central dogma > Translation > Translation factors | OXPHOS > Complex IV > CIV assembly factors | OXPHOS > OXPHOS assembly factors
MFN1	MOM	Mitochondrial dynamics and surveillance > Fusion | Mitochondrial dynamics and surveillance > Organelle contact sites
PPTC7	Matrix	Signaling
MRPL11	Matrix	Mitochondrial central dogma > Translation > Mitochondrial ribosome
COX4I1	MIM	OXPHOS > Complex IV > CIV subunits | OXPHOS > OXPHOS subunits
NDUFS6	MIM	OXPHOS > Complex I > CI subunits | OXPHOS > OXPHOS subunits
MRPL13	Matrix	Mitochondrial central dogma > Translation > Mitochondrial ribosome
OXCT1	Matrix	Metabolism > Carbohydrate metabolism > Ketone metabolism
COX5B	MIM	OXPHOS > Complex IV > CIV subunits | OXPHOS > OXPHOS subunits
PDK2	Matrix	Metabolism > Carbohydrate metabolism > Pyruvate metabolism
ALAS1	Matrix	Metabolism > Metals and cofactors > Heme synthesis and processing
MRPL33	Matrix	Mitochondrial central dogma > Translation > Mitochondrial ribosome
MTO1	Matrix	Mitochondrial central dogma > mtRNA metabolism > mt-tRNA modifications | Metabolism > Vitamin metabolism > Folate and 1-C metabolism
LIAS	Matrix	Metabolism > Lipid metabolism > Lipoate insertion | Metabolism > Metals and cofactors > Fe-S-containing proteins
NDUFA5	MIM	OXPHOS > Complex I > CI subunits | OXPHOS > OXPHOS subunits
NDUFB6	MIM	OXPHOS > Complex I > CI subunits | OXPHOS > OXPHOS subunits
MTX2	MOM	Protein import, sorting and homeostasis > Protein import and sorting > SAM | Mitochondrial dynamics and surveillance > Intramitochondrial membrane interactions
SUCLG2	Matrix	Metabolism > Carbohydrate metabolism > TCA cycle | Metabolism > Carbohydrate metabolism > Itaconate metabolism | Metabolism > Nucleotide metabolism > Nucleotide synthesis and processing
FDX1	Matrix	Metabolism > Lipid metabolism > Cholesterol, bile acid, steroid synthesis | Metabolism > Metals and cofactors > Heme synthesis and processing | Metabolism > Metals and cofactors > Fe-S cluster biosynthesis | Metabolism > Metals and cofactors > Fe-S-containing proteins | Metabolism > Vitamin metabolism > Vitamin D metabolism
SLC25A1	MIM	Metabolism > Carbohydrate metabolism > Gluconeogenesis | Metabolism > Carbohydrate metabolism > TCA-associated | Metabolism > Lipid metabolism | Small molecule transport > SLC25A family
MRPS28	Matrix	Mitochondrial central dogma > Translation > Mitochondrial ribosome
TIMM50	MIM	Protein import, sorting and homeostasis > Protein import and sorting > TIM23 presequence pathway
VDAC2	MOM	Small molecule transport
SLC25A42	MIM	Metabolism > Metals and cofactors > Coenzyme A metabolism | Small molecule transport > SLC25A family
TOMM7	MOM	Protein import, sorting and homeostasis > Protein import and sorting > TOM | Mitochondrial dynamics and surveillance > Mitophagy | Mitochondrial dynamics and surveillance > Autophagy
ECH1	Matrix	Metabolism > Lipid metabolism
GATB	Matrix	Mitochondrial central dogma > Translation > mt-tRNA synthetases
BCS1L	MIM	OXPHOS > Complex III > CIII assembly factors | OXPHOS > OXPHOS assembly factors
ERAL1	Matrix	Mitochondrial central dogma > mtRNA metabolism > mtRNA granules | Mitochondrial central dogma > Translation > Mitochondrial ribosome assembly
CMC1	IMS	OXPHOS > Complex IV > CIV assembly factors | OXPHOS > OXPHOS assembly factors
MRPL28	Matrix	Mitochondrial central dogma > Translation > Mitochondrial ribosome
TSFM	Matrix	Mitochondrial central dogma > Translation > Translation factors
FXN	Matrix	Metabolism > Metals and cofactors > Fe-S cluster biosynthesis
NFU1	Matrix	Metabolism > Metals and cofactors > Fe-S cluster biosynthesis | Metabolism > Metals and cofactors > Fe-S-containing proteins
YARS2	Matrix	Mitochondrial central dogma > Translation > mt-tRNA synthetases
MRPL21	Matrix	Mitochondrial central dogma > Translation > Mitochondrial ribosome
ALDH4A1	Matrix	Metabolism > Amino acid metabolism > Proline metabolism | Metabolism > Amino acid metabolism > Glyoxylate metabolism
TOMM40L	MOM	Protein import, sorting and homeostasis > Protein import and sorting > TOM
NDUFAF1	MIM	OXPHOS > Complex I > CI assembly factors | OXPHOS > OXPHOS assembly factors
NDUFB10	MIM	OXPHOS > Complex I > CI subunits | OXPHOS > OXPHOS subunits
ACADSB	Matrix	Metabolism > Lipid metabolism > Fatty acid oxidation | Metabolism > Amino acid metabolism > Branched-chain amino acid metabolism
MRPS9	Matrix	Mitochondrial central dogma > mtRNA metabolism > mtRNA granules | Mitochondrial central dogma > Translation > Mitochondrial ribosome
COQ8A	MIM	Metabolism > Metals and cofactors > Coenzyme Q metabolism
ACADVL	MIM	Metabolism > Lipid metabolism > Fatty acid oxidation
COQ4	MIM	Metabolism > Metals and cofactors > Coenzyme Q metabolism
MRPL15	Matrix	Mitochondrial central dogma > Translation > Mitochondrial ribosome
NDUFA2	MIM	OXPHOS > Complex I > CI subunits | OXPHOS > OXPHOS subunits
MRPL24	Matrix	Mitochondrial central dogma > Translation > Mitochondrial ribosome
HSPD1	Matrix	Protein import, sorting and homeostasis > Protein homeostasis > Chaperones
NDUFS5	MIM	OXPHOS > Complex I > CI subunits | OXPHOS > OXPHOS subunits
AK3	Matrix	Metabolism > Nucleotide metabolism > Nucleotide synthesis and processing
CYCS	IMS	Metabolism > Metals and cofactors > Heme-containing proteins | Metabolism > Electron carriers > Cytochromes | OXPHOS > OXPHOS subunits | OXPHOS > Cytochrome C | Mitochondrial dynamics and surveillance > Apoptosis
MIPEP	Matrix	Protein import, sorting and homeostasis > Protein import and sorting > Preprotein cleavage | Protein import, sorting and homeostasis > Protein homeostasis > Proteases
LYRM7	Matrix	OXPHOS > Complex III > CIII assembly factors | OXPHOS > OXPHOS assembly factors
CRAT	MIM	Metabolism > Lipid metabolism > Fatty acid oxidation
PCCB	Matrix	Metabolism > Carbohydrate metabolism > Propanoate metabolism | Metabolism > Lipid metabolism > Fatty acid oxidation
MRPS7	Matrix	Mitochondrial central dogma > mtRNA metabolism > mtRNA granules | Mitochondrial central dogma > Translation > Mitochondrial ribosome
MRPL3	Matrix	Mitochondrial central dogma > Translation > Mitochondrial ribosome
PRODH	MIM	Metabolism > Amino acid metabolism > Proline metabolism | Metabolism > Electron carriers > Q-linked reactions, other
PCCA	Matrix	Metabolism > Carbohydrate metabolism > Propanoate metabolism | Metabolism > Lipid metabolism > Fatty acid oxidation | Metabolism > Vitamin metabolism > Biotin utilizing proteins
MCCC1	Matrix	Metabolism > Amino acid metabolism > Branched-chain amino acid metabolism | Metabolism > Vitamin metabolism > Biotin utilizing proteins
MRPS12	Matrix	Mitochondrial central dogma > Translation > Mitochondrial ribosome
CLPB	IMS	Protein import, sorting and homeostasis > Protein homeostasis > Proteases
PDK1	Matrix	Metabolism > Carbohydrate metabolism > Pyruvate metabolism
MRPL49	Matrix	Mitochondrial central dogma > Translation > Mitochondrial ribosome
COX7A2	MIM	OXPHOS > Complex IV > CIV subunits | OXPHOS > OXPHOS subunits
TMEM126A	MIM	OXPHOS > Complex I > CI assembly factors | OXPHOS > OXPHOS assembly factors
ECHDC2	Matrix	0
HCCS	IMS	Metabolism > Metals and cofactors > Heme synthesis and processing | OXPHOS > OXPHOS subunits | OXPHOS > Cytochrome C
HIBADH	Matrix	Metabolism > Amino acid metabolism > Branched-chain amino acid metabolism
MRPL19	Matrix	Mitochondrial central dogma > Translation > Mitochondrial ribosome
MRPL36	Matrix	Mitochondrial central dogma > Translation > Mitochondrial ribosome
SLC25A30	MIM	Metabolism > Sulfur metabolism | Small molecule transport > SLC25A family
BDH1	MIM	Metabolism > Carbohydrate metabolism > Ketone metabolism
FARS2	Matrix	Mitochondrial central dogma > Translation > mt-tRNA synthetases
ABCB7	MIM	Metabolism > Metals and cofactors > Heme synthesis and processing | Metabolism > Metals and cofactors > Fe-S cluster biosynthesis | Metabolism > Metals and cofactors > Molybdenum cofactor synthesis and proteins | Small molecule transport > ABC transporters
MTX1	MOM	Protein import, sorting and homeostasis > Protein import and sorting > SAM | Mitochondrial dynamics and surveillance > Intramitochondrial membrane interactions
NDUFA7	MIM	OXPHOS > Complex I > CI subunits | OXPHOS > OXPHOS subunits
TIMM17A	MIM	Protein import, sorting and homeostasis > Protein import and sorting > TIM23 presequence pathway
ALDH9A1	Matrix	Metabolism > Amino acid metabolism > GABA metabolism | Metabolism > Detoxification > ROS and glutathione metabolism
MRPS18C	Matrix	Mitochondrial central dogma > Translation > Mitochondrial ribosome
MARS2	Matrix	Mitochondrial central dogma > Translation > mt-tRNA synthetases
ALDH6A1	MIM	Metabolism > Amino acid metabolism > Branched-chain amino acid metabolism
FDXR	Matrix	Metabolism > Lipid metabolism > Cholesterol, bile acid, steroid synthesis | Metabolism > Metals and cofactors > Heme synthesis and processing | Metabolism > Metals and cofactors > Fe-S cluster biosynthesis | Metabolism > Vitamin metabolism > Vitamin D metabolism
GATC	Matrix	Mitochondrial central dogma > Translation > mt-tRNA synthetases
TRAP1	Matrix	Protein import, sorting and homeostasis > Protein homeostasis > Chaperones
ACAD8	Matrix	Metabolism > Amino acid metabolism > Branched-chain amino acid metabolism
ALDH2	Matrix	Metabolism > Detoxification > Xenobiotic metabolism
PPIF	Matrix	Signaling > Calcium homeostasis > Mitochondrial permeability transition pore
TIMM22	MIM	Protein import, sorting and homeostasis > Protein import and sorting > TIM22 carrier pathway
IVD	Matrix	Metabolism > Amino acid metabolism > Branched-chain amino acid metabolism
L2HGDH	MIM	Metabolism > Carbohydrate metabolism > TCA-associated
ETHE1	Matrix	Metabolism > Sulfur metabolism
MRPL20	Matrix	Mitochondrial central dogma > Translation > Mitochondrial ribosome
SLC25A5	MIM	Metabolism > Nucleotide metabolism > Nucleotide import | Signaling > Calcium homeostasis > Mitochondrial permeability transition pore | Small molecule transport > SLC25A family
SLC25A12	MIM	Metabolism > Carbohydrate metabolism > Malate-aspartate shuttle | Metabolism > Amino acid metabolism > Glutamate metabolism | Signaling > Calcium homeostasis > EF hand proteins | Small molecule transport > SLC25A family
MRPS21	Matrix	Mitochondrial central dogma > Translation > Mitochondrial ribosome
TOMM22	MOM	Protein import, sorting and homeostasis > Protein import and sorting > TOM
ACAA2	Matrix	Metabolism > Carbohydrate metabolism > Ketone metabolism | Metabolism > Lipid metabolism > Fatty acid oxidation | Metabolism > Amino acid metabolism > Lysine metabolism
MRPL30	Matrix	Mitochondrial central dogma > Translation > Mitochondrial ribosome
DNAJA3	Matrix	Protein import, sorting and homeostasis > Protein homeostasis > Chaperones
NDUFB2	MIM	OXPHOS > Complex I > CI subunits | OXPHOS > OXPHOS subunits
MRPS34	Matrix	Mitochondrial central dogma > Translation > Mitochondrial ribosome
ETFB	Matrix	Metabolism > Lipid metabolism > Fatty acid oxidation | Metabolism > Amino acid metabolism > Branched-chain amino acid metabolism | Metabolism > Amino acid metabolism > Lysine metabolism | Metabolism > Amino acid metabolism > Glycine metabolism | Metabolism > Vitamin metabolism > Choline and betaine metabolism | Metabolism > Electron carriers > Q-linked reactions, other
AFG1L	MIM	Protein import, sorting and homeostasis > Protein homeostasis > Proteases
ATP5IF1	Matrix	OXPHOS > Complex V > CV subunits | OXPHOS > OXPHOS subunits
ATP5PB	MIM	OXPHOS > Complex V > CV subunits | OXPHOS > OXPHOS subunits
COX7C	MIM	OXPHOS > Complex IV > CIV subunits | OXPHOS > OXPHOS subunits
CHCHD3	MIM	Mitochondrial dynamics and surveillance > Cristae formation > MICOS complex | Mitochondrial dynamics and surveillance > Intramitochondrial membrane interactions
COQ10B	MIM	Metabolism > Metals and cofactors > Coenzyme Q metabolism
ACSF3	Matrix	Metabolism > Lipid metabolism > Type II fatty acid synthesis
POLDIP2	Matrix	Mitochondrial central dogma > mtDNA maintenance > mtDNA nucleoid
SLC25A10	MIM	Metabolism > Carbohydrate metabolism > Gluconeogenesis | Metabolism > Carbohydrate metabolism > Malate-aspartate shuttle | Small molecule transport > SLC25A family
SLC25A13	MIM	Metabolism > Carbohydrate metabolism > Malate-aspartate shuttle | Metabolism > Amino acid metabolism > Urea cycle | Signaling > Calcium homeostasis > EF hand proteins | Small molecule transport > SLC25A family
PDK3	Matrix	Metabolism > Carbohydrate metabolism > Pyruvate metabolism
ME3	Matrix	Metabolism > Carbohydrate metabolism > TCA-associated
MRPL22	Matrix	Mitochondrial central dogma > Translation > Mitochondrial ribosome
IDH2	Matrix	Metabolism > Carbohydrate metabolism > TCA cycle
GCDH	Matrix	Metabolism > Amino acid metabolism > Lysine metabolism
MRPL47	Matrix	Mitochondrial central dogma > mtRNA metabolism > mtRNA granules | Mitochondrial central dogma > Translation > Mitochondrial ribosome
PPA2	Matrix	Mitochondrial central dogma > mtDNA maintenance | Mitochondrial central dogma > mtRNA metabolism | Mitochondrial central dogma > Translation | Metabolism > Nucleotide metabolism
MRPL9	Matrix	Mitochondrial central dogma > Translation > Mitochondrial ribosome
CHCHD10	IMS	0
WARS2	Matrix	Mitochondrial central dogma > Translation > mt-tRNA synthetases
SLC25A19	MIM	Metabolism > Vitamin metabolism > Vitamin B1 metabolism | Small molecule transport > SLC25A family
CBR4	Matrix	Metabolism > Lipid metabolism > Type II fatty acid synthesis
SMDT1	MIM	Signaling > Calcium homeostasis > Calcium cycle | Small molecule transport > Calcium uniporter
HAGH	Matrix	Metabolism > Detoxification > ROS and glutathione metabolism
COX7A1	MIM	OXPHOS > Complex IV > CIV subunits | OXPHOS > OXPHOS subunits
MTG1	Matrix	Mitochondrial central dogma > Translation > Mitochondrial ribosome assembly
COX14	MIM	Mitochondrial central dogma > Translation > Translation factors | OXPHOS > Complex IV > CIV assembly factors | OXPHOS > OXPHOS assembly factors
NDUFA12	MIM	OXPHOS > Complex I > CI subunits | OXPHOS > OXPHOS subunits
MRPS16	Matrix	Mitochondrial central dogma > Translation > Mitochondrial ribosome
MTERF2	Matrix	Mitochondrial central dogma > mtDNA maintenance > mtDNA nucleoid
ETFRF1	Matrix	Metabolism > Electron carriers > Q-linked reactions, other
GPD2	MIM	Metabolism > Carbohydrate metabolism > Glycerol phosphate shuttle | Metabolism > Electron carriers > Q-linked reactions, other
NDUFA10	MIM	OXPHOS > Complex I > CI subunits | OXPHOS > OXPHOS subunits
NDUFC2	MIM	OXPHOS > Complex I > CI subunits | OXPHOS > OXPHOS subunits
SLIRP	Matrix	Mitochondrial central dogma > mtRNA metabolism > mtRNA stability and decay | Mitochondrial central dogma > Translation
MT-ATP6	MIM	OXPHOS > Complex V > CV subunits | OXPHOS > OXPHOS subunits
MT-CO2	MIM	OXPHOS > Complex IV > CIV subunits | OXPHOS > OXPHOS subunits
TIMM21	MIM	Mitochondrial central dogma > Translation > Translation factors | Protein import, sorting and homeostasis > Protein import and sorting > TIM23 presequence pathway | OXPHOS > Complex IV > CIV assembly factors | OXPHOS > OXPHOS assembly factors
NDUFA8	MIM	OXPHOS > Complex I > CI subunits | OXPHOS > OXPHOS subunits
GLS	MIM	Metabolism > Amino acid metabolism > Glutamate metabolism
NDUFB11	MIM	OXPHOS > Complex I > CI subunits | OXPHOS > OXPHOS subunits
DHTKD1	Matrix	Metabolism > Amino acid metabolism > Lysine metabolism
FAHD2A	Matrix	0
HSD17B8	Matrix	Metabolism > Lipid metabolism > Type II fatty acid synthesis | Metabolism > Lipid metabolism > Cholesterol, bile acid, steroid synthesis
HINT2	Matrix	Metabolism > Lipid metabolism > Cholesterol, bile acid, steroid synthesis
MRPS5	Matrix	Mitochondrial central dogma > Translation > Mitochondrial ribosome
C6orf136	Matrix	0
SPRYD4	Matrix	0
LIPT2	Matrix	Metabolism > Lipid metabolism > Lipoate insertion
DECR1	Matrix	Metabolism > Lipid metabolism > Fatty acid oxidation
MRPS26	Matrix	Mitochondrial central dogma > Translation > Mitochondrial ribosome
SLC25A15	MIM	Metabolism > Amino acid metabolism > Urea cycle | Small molecule transport > SLC25A family
NDUFV3	MIM	OXPHOS > Complex I > CI subunits | OXPHOS > OXPHOS subunits
BPHL	Matrix	Metabolism > Detoxification > Xenobiotic metabolism
STOML2	MIM	Protein import, sorting and homeostasis > Protein homeostasis
MSRB2	Matrix	Metabolism > Detoxification > ROS and glutathione metabolism | Metabolism > Sulfur metabolism
LACTB	IMS	Protein import, sorting and homeostasis > Protein homeostasis > Proteases | Metabolism > Lipid metabolism > Phospholipid metabolism
TOMM40	MOM	Protein import, sorting and homeostasis > Protein import and sorting > TOM
SLC25A25	MIM	Metabolism > Nucleotide metabolism > Nucleotide import | Signaling > Calcium homeostasis > EF hand proteins | Small molecule transport > SLC25A family
ADCK5	unknown	0
ACAD10	Matrix	Metabolism > Lipid metabolism > Fatty acid oxidation
VWA8	Matrix	0
CCDC90B	MIM	0
DNAJC11	MOM	Protein import, sorting and homeostasis > Protein import and sorting | Mitochondrial dynamics and surveillance > Intramitochondrial membrane interactions
ALKBH7	Matrix	0
GLDC	Matrix	Metabolism > Amino acid metabolism > Glycine metabolism | Metabolism > Amino acid metabolism > Glycine cleavage system
MPC1L	MIM	Metabolism > Carbohydrate metabolism > Gluconeogenesis | Metabolism > Carbohydrate metabolism > Pyruvate metabolism | Metabolism > Carbohydrate metabolism > TCA-associated | Small molecule transport
THEM4	MIM	Metabolism > Lipid metabolism
SSBP1	Matrix	Mitochondrial central dogma > mtDNA maintenance > mtDNA replication | Mitochondrial central dogma > mtDNA maintenance > mtDNA nucleoid
MRPL27	Matrix	Mitochondrial central dogma > Translation > Mitochondrial ribosome
HSCB	Matrix	Metabolism > Metals and cofactors > Fe-S cluster biosynthesis
MRPS10	Matrix	Mitochondrial central dogma > Translation > Mitochondrial ribosome
AK4	Matrix	Metabolism > Nucleotide metabolism > Nucleotide synthesis and processing
ATAD3A	MIM	Mitochondrial central dogma > mtDNA maintenance > mtDNA nucleoid | Mitochondrial dynamics and surveillance > Organelle contact sites | Mitochondrial dynamics and surveillance > Intramitochondrial membrane interactions
MRPL37	Matrix	Mitochondrial central dogma > Translation > Mitochondrial ribosome
PTGES2	MIM	Metabolism > Lipid metabolism > Eicosanoid metabolism
TXNRD2	Matrix	Metabolism > Detoxification > ROS and glutathione metabolism | Metabolism > Detoxification > Selenoproteins
ACSM5	Matrix	Metabolism > Lipid metabolism > Fatty acid oxidation | Metabolism > Detoxification > Xenobiotic metabolism
CISD1	MOM	Metabolism > Metals and cofactors > Fe-S cluster biosynthesis | Metabolism > Metals and cofactors > Fe-S-containing proteins
MRPL41	Matrix	Mitochondrial central dogma > Translation > Mitochondrial ribosome
MTARC2	MOM	Metabolism > Metals and cofactors > Molybdenum cofactor synthesis and proteins | Metabolism > Detoxification > Xenobiotic metabolism | Metabolism > Detoxification > Amidoxime reducing complex
MRPS6	Matrix	Mitochondrial central dogma > Translation > Mitochondrial ribosome
MRPL23	Matrix	Mitochondrial central dogma > Translation > Mitochondrial ribosome
SQOR	MIM	Metabolism > Electron carriers > Q-linked reactions, other | Metabolism > Sulfur metabolism
SCO1	MIM	OXPHOS > Complex IV > CIV assembly factors | Metabolism > Metals and cofactors > Copper metabolism | OXPHOS > OXPHOS assembly factors
GCAT	unknown	Metabolism > Amino acid metabolism > Glycine metabolism
MTHFD1L	Matrix	Metabolism > Vitamin metabolism > Folate and 1-C metabolism
ECI2	Matrix	Metabolism > Lipid metabolism > Fatty acid oxidation
UQCRB	MIM	OXPHOS > Complex III > CIII subunits | OXPHOS > OXPHOS subunits
ATP5PD	MIM	OXPHOS > Complex V > CV subunits | OXPHOS > OXPHOS subunits
ATP5MG	MIM	OXPHOS > Complex V > CV subunits | OXPHOS > OXPHOS subunits | Mitochondrial dynamics and surveillance > Cristae formation
CCDC58	IMS	0
MCCC2	Matrix	Metabolism > Amino acid metabolism > Branched-chain amino acid metabolism
MCEE	Matrix	Metabolism > Carbohydrate metabolism > Propanoate metabolism | Metabolism > Lipid metabolism > Fatty acid oxidation
MOCS1	Matrix	Metabolism > Metals and cofactors > Molybdenum cofactor synthesis and proteins
MMUT	Matrix	Metabolism > Carbohydrate metabolism > Propanoate metabolism | Metabolism > Lipid metabolism > Fatty acid oxidation | Metabolism > Vitamin metabolism > Vitamin B12 metabolism
SLC25A51	MIM	Metabolism > Metals and cofactors > NAD biosynthesis and metabolism | Small molecule transport > SLC25A family
SPG7	MIM	Protein import, sorting and homeostasis > Protein homeostasis > Proteases
ATP5MC3	MIM	OXPHOS > Complex V > CV subunits | OXPHOS > OXPHOS subunits
ATAD1	MOM	Protein import, sorting and homeostasis > Protein homeostasis > Proteases
OXNAD1	Matrix	0
MTG2	Matrix	Mitochondrial central dogma > Translation > Mitochondrial ribosome assembly
DARS2	Matrix	Mitochondrial central dogma > Translation > mt-tRNA synthetases
MRPL51	Matrix	Mitochondrial central dogma > Translation > Mitochondrial ribosome
PC	Matrix	Metabolism > Carbohydrate metabolism > Gluconeogenesis | Metabolism > Carbohydrate metabolism > TCA-associated | Metabolism > Vitamin metabolism > Biotin utilizing proteins
CLYBL	Matrix	Metabolism > Carbohydrate metabolism > Itaconate metabolism
PNPLA8	MIM	Metabolism > Lipid metabolism > Cardiolipin synthesis | Metabolism > Lipid metabolism > Phospholipid metabolism
MLYCD	Matrix	Metabolism > Lipid metabolism
PYURF	unknown	0
TIMM17B	MIM	Protein import, sorting and homeostasis > Protein import and sorting > TIM23 presequence pathway
MRPL32	Matrix	Mitochondrial central dogma > Translation > Mitochondrial ribosome
SLC25A26	MIM	Small molecule transport > SLC25A family
PRODH2	MIM	Metabolism > Amino acid metabolism > Glyoxylate metabolism | Metabolism > Electron carriers > Q-linked reactions, other
NIT2	unknown	Metabolism > Detoxification
FDX2	Matrix	Metabolism > Metals and cofactors > Heme synthesis and processing | Metabolism > Metals and cofactors > Fe-S cluster biosynthesis | Metabolism > Metals and cofactors > Fe-S-containing proteins
ME2	Matrix	Metabolism > Carbohydrate metabolism > TCA-associated
TUFM	Matrix	Mitochondrial central dogma > Translation > Translation factors
COX6A2	MIM	OXPHOS > Complex IV > CIV subunits | OXPHOS > OXPHOS subunits
SLC30A9	MIM	Small molecule transport
TAMM41	MIM	Metabolism > Lipid metabolism > Cardiolipin synthesis | Metabolism > Lipid metabolism > Phospholipid metabolism
TIMM23	MIM	Protein import, sorting and homeostasis > Protein import and sorting > TIM23 presequence pathway
RMND1	MIM	Mitochondrial central dogma > mtRNA metabolism > mtRNA granules | Mitochondrial central dogma > Translation
MFN2	MOM	Mitochondrial dynamics and surveillance > Fusion | Mitochondrial dynamics and surveillance > Organelle contact sites
DNLZ	Matrix	Protein import, sorting and homeostasis > Protein homeostasis > Chaperones
CHCHD4	IMS	Protein import, sorting and homeostasis > Protein import and sorting > MIA40
NDUFAB1	MIM	OXPHOS > Complex I > CI subunits | Metabolism > Lipid metabolism > Type II fatty acid synthesis | Metabolism > Metals and cofactors > Fe-S cluster biosynthesis | OXPHOS > OXPHOS subunits
ACSM1	Matrix	Metabolism > Lipid metabolism > Fatty acid oxidation
COA5	IMS	OXPHOS > Complex IV > CIV assembly factors | OXPHOS > OXPHOS assembly factors
COQ2	MIM	Metabolism > Metals and cofactors > Coenzyme Q metabolism
PDSS2	MIM	Metabolism > Metals and cofactors > Coenzyme Q metabolism
EHHADH	unknown	Metabolism > Lipid metabolism
NDUFS3	MIM	OXPHOS > Complex I > CI subunits | OXPHOS > OXPHOS subunits
ABCB10	MIM	Metabolism > Metals and cofactors > Heme synthesis and processing | Small molecule transport > ABC transporters
CKMT2	MIM	Metabolism > Nucleotide metabolism > Creatine metabolism
MRPS25	Matrix	Mitochondrial central dogma > Translation > Mitochondrial ribosome
ACAD9	MIM	OXPHOS > Complex I > CI assembly factors | OXPHOS > OXPHOS assembly factors
COX16	MIM	OXPHOS > Complex IV > CIV assembly factors | OXPHOS > OXPHOS assembly factors
FAM210A	MIM	0
ACOT13	Matrix	Metabolism > Lipid metabolism
CPT1A	MOM	Metabolism > Lipid metabolism > Fatty acid oxidation | Metabolism > Metals and cofactors > Carnitine synthesis and transport | Metabolism > Metals and cofactors > Carnitine shuttle
DHRS4	Matrix	Metabolism > Vitamin metabolism > Vitamin A metabolism
PRELID2	IMS	0
CARS2	Matrix	Mitochondrial central dogma > Translation > mt-tRNA synthetases
NIPSNAP2	Matrix	Mitochondrial dynamics and surveillance > Mitophagy | Mitochondrial dynamics and surveillance > Autophagy
NDUFB7	MIM	OXPHOS > Complex I > CI subunits | OXPHOS > OXPHOS subunits
MICOS13	MIM	Mitochondrial dynamics and surveillance > Cristae formation > MICOS complex
GLRX2	Matrix	Metabolism > Metals and cofactors > Fe-S-containing proteins | Metabolism > Vitamin metabolism > Vitamin C metabolism | Metabolism > Detoxification > ROS and glutathione metabolism
MRPS30	Matrix	Mitochondrial central dogma > Translation > Mitochondrial ribosome
SCO2	MIM	OXPHOS > Complex IV > CIV assembly factors | Metabolism > Metals and cofactors > Copper metabolism | OXPHOS > OXPHOS assembly factors
HSD17B10	Matrix	Mitochondrial central dogma > mtRNA metabolism > mtRNA granules | Mitochondrial central dogma > mtRNA metabolism > Polycistronic mtRNA processing | Mitochondrial central dogma > mtRNA metabolism > mt-tRNA modifications | Metabolism > Lipid metabolism > Fatty acid oxidation | Metabolism > Lipid metabolism > Cholesterol, bile acid, steroid synthesis | Metabolism > Amino acid metabolism > Branched-c…
NARS2	Matrix	Mitochondrial central dogma > Translation > mt-tRNA synthetases
RPUSD3	Matrix	Mitochondrial central dogma > mtRNA metabolism > mtRNA granules | Mitochondrial central dogma > mtRNA metabolism > mt-rRNA modifications
SUOX	IMS	Metabolism > Metals and cofactors > Molybdenum cofactor synthesis and proteins | Metabolism > Sulfur metabolism
SARDH	Matrix	Metabolism > Amino acid metabolism > Glycine metabolism | Metabolism > Vitamin metabolism > Choline and betaine metabolism | Metabolism > Vitamin metabolism > Folate and 1-C metabolism
RIDA	Matrix	0
COX8A	MIM	OXPHOS > Complex IV > CIV subunits | OXPHOS > OXPHOS subunits
SPR	unknown	Metabolism > Metals and cofactors > Tetrahydobiopterin synthesis
MPV17	MIM	Small molecule transport
ZADH2	unknown	Metabolism > Lipid metabolism > Eicosanoid metabolism
MRPL18	Matrix	Mitochondrial central dogma > Translation > Mitochondrial ribosome
ALDH1B1	Matrix	Metabolism > Detoxification > Xenobiotic metabolism
CHCHD1	MIM	Mitochondrial central dogma > Translation > Mitochondrial ribosome
TIMM8A	MIM	Protein import, sorting and homeostasis > Protein homeostasis > Chaperones | Protein import, sorting and homeostasis > Protein import and sorting
VDAC3	MOM	Signaling > Calcium homeostasis > Mitochondrial permeability transition pore | Small molecule transport
SLC25A24	MIM	Metabolism > Nucleotide metabolism > Nucleotide import | Signaling > Calcium homeostasis > EF hand proteins | Small molecule transport > SLC25A family
MPC1	MIM	Metabolism > Carbohydrate metabolism > Gluconeogenesis | Metabolism > Carbohydrate metabolism > Pyruvate metabolism | Metabolism > Carbohydrate metabolism > TCA-associated | Small molecule transport
SLC25A22	MIM	Small molecule transport > SLC25A family
SLC25A31	MIM	Metabolism > Nucleotide metabolism > Nucleotide import | Signaling > Calcium homeostasis > Mitochondrial permeability transition pore | Small molecule transport > SLC25A family
SLC25A18	MIM	Small molecule transport > SLC25A family
TRNT1	Matrix	Mitochondrial central dogma > mtRNA metabolism > mt-tRNA modifications
IDE	Matrix	Protein import, sorting and homeostasis > Protein homeostasis > Proteases
GSTK1	Matrix	Metabolism > Detoxification > Xenobiotic metabolism
VARS2	Matrix	Mitochondrial central dogma > Translation > mt-tRNA synthetases
HSPE1	Matrix	Protein import, sorting and homeostasis > Protein homeostasis > Chaperones
MRPL54	Matrix	Mitochondrial central dogma > Translation > Mitochondrial ribosome
MRPL38	Matrix	Mitochondrial central dogma > Translation > Mitochondrial ribosome
MRPL58	Matrix	Mitochondrial central dogma > Translation > Mitochondrial ribosome | Mitochondrial central dogma > Translation > Translation factors
MTCH1	MOM	Small molecule transport > SLC25A family
TRIAP1	IMS	Metabolism > Lipid metabolism > Cardiolipin synthesis | Metabolism > Lipid metabolism > Phospholipid metabolism
PTCD3	Matrix	Mitochondrial central dogma > Translation > Mitochondrial ribosome | Mitochondrial central dogma > Translation > Mitochondrial ribosome assembly
COX10	MIM	OXPHOS > Complex IV > CIV assembly factors | Metabolism > Metals and cofactors > Heme synthesis and processing | OXPHOS > OXPHOS assembly factors
AKAP1	MOM	Signaling > cAMP-PKA signaling
MRM3	Matrix	Mitochondrial central dogma > mtRNA metabolism > mt-rRNA modifications | Mitochondrial central dogma > Translation > Mitochondrial ribosome assembly
AK2	IMS	Metabolism > Nucleotide metabolism > Nucleotide synthesis and processing
TMEM70	MIM	OXPHOS > Complex I > CI assembly factors | OXPHOS > Complex V > CV assembly factors | OXPHOS > OXPHOS assembly factors
NOA1	MIM	Mitochondrial central dogma > mtRNA metabolism > mtRNA granules | Mitochondrial central dogma > Translation > Mitochondrial ribosome assembly
MCUR1	MIM	0
TMEM14C	MIM	0
NDUFC1	MIM	OXPHOS > Complex I > CI subunits | OXPHOS > OXPHOS subunits
MRPL35	Matrix	Mitochondrial central dogma > Translation > Mitochondrial ribosome
NDUFA3	MIM	OXPHOS > Complex I > CI subunits | OXPHOS > OXPHOS subunits
PDSS1	MIM	Metabolism > Metals and cofactors > Coenzyme Q metabolism
SLC25A16	MIM	Small molecule transport > SLC25A family
FMC1	Matrix	OXPHOS > Complex V > CV assembly factors | OXPHOS > OXPHOS assembly factors
ACSM3	Matrix	Metabolism > Lipid metabolism > Fatty acid oxidation
NDUFAF6	MIM	OXPHOS > Complex I > CI assembly factors | OXPHOS > OXPHOS assembly factors
UCP1	MIM	Small molecule transport > SLC25A family
SFXN1	MIM	Metabolism > Amino acid metabolism > Serine metabolism | Metabolism > Vitamin metabolism > Folate and 1-C metabolism | Small molecule transport > Sideroflexins
GLRX5	Matrix	Metabolism > Metals and cofactors > Fe-S cluster biosynthesis | Metabolism > Metals and cofactors > Fe-S-containing proteins
PTRH1	Matrix	0
MRPS11	Matrix	Mitochondrial central dogma > Translation > Mitochondrial ribosome
XPNPEP3	Matrix	Protein import, sorting and homeostasis > Protein import and sorting > Preprotein cleavage | Protein import, sorting and homeostasis > Protein homeostasis > Proteases
PDP1	MIM	Metabolism > Carbohydrate metabolism > Pyruvate metabolism
ECI1	Matrix	Metabolism > Lipid metabolism > Fatty acid oxidation
SLC25A21	MIM	Metabolism > Amino acid metabolism | Small molecule transport > SLC25A family
SLC25A29	MIM	Metabolism > Amino acid metabolism > Lysine metabolism | Small molecule transport > SLC25A family
SLC25A45	MIM	Small molecule transport > SLC25A family
SDHAF3	Matrix	OXPHOS > Complex II > CII assembly factors | OXPHOS > OXPHOS assembly factors
PRELID3B	IMS	Metabolism > Lipid metabolism > Phospholipid metabolism
SLC25A39	MIM	Small molecule transport > SLC25A family
NDUFB3	MIM	OXPHOS > Complex I > CI subunits | OXPHOS > OXPHOS subunits
REXO2	Matrix	Mitochondrial central dogma > mtRNA metabolism > mtRNA stability and decay
GATM	Matrix	Metabolism > Nucleotide metabolism > Creatine metabolism
TIMM10B	MIM	Protein import, sorting and homeostasis > Protein homeostasis > Chaperones | Protein import, sorting and homeostasis > Protein import and sorting
SARS2	Matrix	Mitochondrial central dogma > Translation > mt-tRNA synthetases
CHDH	MIM	Metabolism > Amino acid metabolism > Glycine metabolism | Metabolism > Vitamin metabolism > Choline and betaine metabolism | Metabolism > Vitamin metabolism > Folate and 1-C metabolism | Metabolism > Electron carriers > Q-linked reactions, other
MRPL57	Matrix	Mitochondrial central dogma > Translation > Mitochondrial ribosome
C8orf82	Matrix	0
EARS2	Matrix	Mitochondrial central dogma > Translation > mt-tRNA synthetases
GRHPR	Matrix	Metabolism > Amino acid metabolism > Glyoxylate metabolism
MTFMT	Matrix	Mitochondrial central dogma > Translation > fMet processing | Metabolism > Vitamin metabolism > Folate and 1-C metabolism
PTCD2	Matrix	Mitochondrial central dogma > mtRNA metabolism > mtRNA granules | Mitochondrial central dogma > mtRNA metabolism > Polycistronic mtRNA processing
ECHDC1	unknown	Metabolism > Lipid metabolism
HARS2	Matrix	Mitochondrial central dogma > Translation > mt-tRNA synthetases
NDUFA4	MIM	OXPHOS > Complex IV > CIV subunits | OXPHOS > OXPHOS subunits
NDUFA13	MIM	OXPHOS > Complex I > CI subunits | OXPHOS > OXPHOS subunits
NAXE	Matrix	Metabolism > Metals and cofactors > NAD biosynthesis and metabolism
TMEM11	MIM	Mitochondrial dynamics and surveillance
SELENOO	Matrix	Metabolism > Detoxification > Selenoproteins
NAGS	Matrix	Metabolism > Amino acid metabolism > Urea cycle
HSD17B4	unknown	Metabolism > Lipid metabolism
NDUFAF7	MIM	OXPHOS > Complex I > CI assembly factors | OXPHOS > OXPHOS assembly factors
OAT	Matrix	Metabolism > Amino acid metabolism > Proline metabolism
MRPL50	Matrix	Mitochondrial central dogma > Translation > Mitochondrial ribosome
COX7B	MIM	OXPHOS > Complex IV > CIV subunits | OXPHOS > OXPHOS subunits
RARS2	Matrix	Mitochondrial central dogma > Translation > mt-tRNA synthetases
OXLD1	unknown	0
LACTB2	Matrix	Mitochondrial central dogma > mtRNA metabolism > mtRNA stability and decay
NDUFA11	MIM	OXPHOS > Complex I > CI subunits | OXPHOS > OXPHOS subunits
AURKAIP1	Matrix	Mitochondrial central dogma > Translation > Mitochondrial ribosome
CHCHD7	IMS	Metabolism > Metals and cofactors > Copper metabolism
SHMT2	Matrix	Metabolism > Amino acid metabolism > Serine metabolism | Metabolism > Amino acid metabolism > Glycine metabolism | Metabolism > Vitamin metabolism > Folate and 1-C metabolism
MTHFD2	Matrix	Metabolism > Vitamin metabolism > Folate and 1-C metabolism
RMDN1	MOM	0
CPS1	Matrix	Metabolism > Amino acid metabolism > Urea cycle
MRPL14	Matrix	Mitochondrial central dogma > Translation > Mitochondrial ribosome
MTRES1	Matrix	Mitochondrial central dogma > mtRNA metabolism > Transcription | Mitochondrial central dogma > Translation
RDH13	MIM	Metabolism > Vitamin metabolism > Vitamin A metabolism
TRMT2B	Matrix	Mitochondrial central dogma > mtRNA metabolism > mt-tRNA modifications | Mitochondrial central dogma > mtRNA metabolism > mt-rRNA modifications
MRPS24	Matrix	Mitochondrial central dogma > Translation > Mitochondrial ribosome
COA3	MIM	Mitochondrial central dogma > Translation > Translation factors | OXPHOS > Complex IV > CIV assembly factors | OXPHOS > OXPHOS assembly factors
GSR	Matrix	Metabolism > Detoxification > ROS and glutathione metabolism
ENDOG	IMS	Mitochondrial central dogma > mtDNA maintenance > mtDNA stability and decay | Mitochondrial central dogma > mtRNA metabolism > mtRNA stability and decay | Mitochondrial dynamics and surveillance > Apoptosis
BCAT2	Matrix	Metabolism > Amino acid metabolism > Branched-chain amino acid metabolism
TEFM	Matrix	Mitochondrial central dogma > mtRNA metabolism > Transcription
ACSF2	Matrix	Metabolism > Lipid metabolism > Fatty acid oxidation
TRMU	Matrix	Mitochondrial central dogma > mtRNA metabolism > mt-tRNA modifications
MRPS22	Matrix	Mitochondrial central dogma > Translation > Mitochondrial ribosome
LAP3	Matrix	Protein import, sorting and homeostasis > Protein homeostasis > Proteases
GLUD1	Matrix	Metabolism > Amino acid metabolism > Glutamate metabolism | Metabolism > Amino acid metabolism > GABA metabolism
HMGCL	Matrix	Metabolism > Carbohydrate metabolism > Ketone metabolism | Metabolism > Amino acid metabolism > Branched-chain amino acid metabolism
FHIT	Matrix	Metabolism > Nucleotide metabolism > Nucleotide synthesis and processing
MRPS33	Matrix	Mitochondrial central dogma > Translation > Mitochondrial ribosome
NUBPL	Matrix	OXPHOS > Complex I > CI assembly factors | Metabolism > Metals and cofactors > Fe-S cluster biosynthesis | Metabolism > Metals and cofactors > Fe-S-containing proteins | OXPHOS > OXPHOS assembly factors
LYRM2	Matrix	OXPHOS > Complex I > CI assembly factors | OXPHOS > OXPHOS assembly factors
MPV17L	MIM	Small molecule transport
GADD45GIP1	Matrix	Mitochondrial central dogma > Translation > Mitochondrial ribosome
TFAM	Matrix	Mitochondrial central dogma > mtDNA maintenance > mtDNA replication | Mitochondrial central dogma > mtDNA maintenance > mtDNA nucleoid | Mitochondrial central dogma > mtRNA metabolism > Transcription
ALDH18A1	Matrix	Metabolism > Amino acid metabolism > Proline metabolism
OXSM	Matrix	Metabolism > Lipid metabolism > Type II fatty acid synthesis
KYAT3	Matrix	Metabolism > Amino acid metabolism > Kynurenine metabolism | Metabolism > Metals and cofactors > NAD biosynthesis and metabolism
TARS2	Matrix	Mitochondrial central dogma > Translation > mt-tRNA synthetases
TBRG4	Matrix	Mitochondrial central dogma > mtRNA metabolism > Polycistronic mtRNA processing | Mitochondrial central dogma > mtRNA metabolism > mtRNA stability and decay
TMEM65	MIM	0
ROMO1	MIM	Protein import, sorting and homeostasis > Protein import and sorting > TIM23 presequence pathway | Small molecule transport
PRDX5	Matrix	Metabolism > Detoxification > ROS and glutathione metabolism
DNAJC15	MIM	Protein import, sorting and homeostasis > Protein import and sorting > Import motor
MAIP1	Matrix	Protein import, sorting and homeostasis > Protein homeostasis > Chaperones
HIGD1A	MIM	OXPHOS > Complex IV > CIV assembly factors | OXPHOS > OXPHOS assembly factors | OXPHOS > Respirasome assembly
C16orf91	IMS	0
RHOT2	MOM	Signaling > Calcium homeostasis > EF hand proteins | Mitochondrial dynamics and surveillance > Trafficking
SLC25A44	MIM	Metabolism > Amino acid metabolism > Branched-chain amino acid metabolism | Small molecule transport > SLC25A family
HAO2	unknown	Metabolism > Lipid metabolism
OXA1L	MIM	Protein import, sorting and homeostasis > Protein import and sorting > OXA | Mitochondrial central dogma > Translation
SLC25A46	MOM	Small molecule transport > SLC25A family | Mitochondrial dynamics and surveillance > Fission | Mitochondrial dynamics and surveillance > Intramitochondrial membrane interactions
RDH14	Membrane	Metabolism > Vitamin metabolism > Vitamin A metabolism
ATP5MPL	MIM	OXPHOS > Complex V > CV subunits | OXPHOS > OXPHOS subunits
CA5B	Matrix	Metabolism > Amino acid metabolism > Urea cycle
COASY	Matrix	Metabolism > Metals and cofactors > Coenzyme A metabolism
CISD3	Matrix	Metabolism > Metals and cofactors > Fe-S cluster biosynthesis | Metabolism > Metals and cofactors > Fe-S-containing proteins
GSTZ1	Matrix	Metabolism > Detoxification > Xenobiotic metabolism
COX6B2	MIM	OXPHOS > Complex IV > CIV subunits | OXPHOS > OXPHOS subunits
GLOD4	Matrix	0
ACAA1	unknown	Metabolism > Lipid metabolism
CROT	unknown	Metabolism > Lipid metabolism > Fatty acid oxidation
PDF	Matrix	Mitochondrial central dogma > Translation > fMet processing | Protein import, sorting and homeostasis > Protein homeostasis
COX19	IMS	OXPHOS > Complex IV > CIV assembly factors | Metabolism > Metals and cofactors > Copper metabolism | OXPHOS > OXPHOS assembly factors
AMT	Matrix	Metabolism > Amino acid metabolism > Glycine metabolism | Metabolism > Amino acid metabolism > Glycine cleavage system | Metabolism > Vitamin metabolism > Folate and 1-C metabolism
PDPR	Matrix	Metabolism > Carbohydrate metabolism > Pyruvate metabolism
NLN	Matrix	Protein import, sorting and homeostasis > Protein homeostasis > Proteases
BOLA1	Matrix	Metabolism > Metals and cofactors > Fe-S cluster biosynthesis | Metabolism > Metals and cofactors > Fe-S-containing proteins
ALAS2	Matrix	Metabolism > Metals and cofactors > Heme synthesis and processing
GRPEL2	Matrix	Protein import, sorting and homeostasis > Protein import and sorting > Import motor | Metabolism > Metals and cofactors > Fe-S cluster biosynthesis
ALDH7A1	Matrix	Metabolism > Amino acid metabolism > Lysine metabolism | Metabolism > Amino acid metabolism > Glycine metabolism | Metabolism > Vitamin metabolism > Choline and betaine metabolism | Metabolism > Vitamin metabolism > Folate and 1-C metabolism | Metabolism > Detoxification > ROS and glutathione metabolism
HDHD5	Matrix	0
GFER	IMS	Protein import, sorting and homeostasis > Protein import and sorting > MIA40
IMMP2L	MIM	Protein import, sorting and homeostasis > Protein import and sorting > Preprotein cleavage | Protein import, sorting and homeostasis > Protein homeostasis > Proteases
COX4I2	MIM	OXPHOS > Complex IV > CIV subunits | OXPHOS > OXPHOS subunits
MRPL39	Matrix	Mitochondrial central dogma > Translation > Mitochondrial ribosome
AADAT	Matrix	Metabolism > Amino acid metabolism > Lysine metabolism
FUNDC2	MOM	Mitochondrial dynamics and surveillance > Organelle contact sites | Signaling
LYPLA1	unknown	Metabolism > Lipid metabolism | Signaling
PDHA2	Matrix	Metabolism > Carbohydrate metabolism > Pyruvate metabolism
MTRF1L	Matrix	Mitochondrial central dogma > Translation > Translation factors
GTPBP3	Matrix	Mitochondrial central dogma > mtRNA metabolism > mt-tRNA modifications | Metabolism > Vitamin metabolism > Folate and 1-C metabolism
MTHFD2L	Matrix	Metabolism > Vitamin metabolism > Folate and 1-C metabolism
YME1L1	MIM	Protein import, sorting and homeostasis > Protein homeostasis > Proteases
ACOT2	Matrix	Metabolism > Lipid metabolism
COA8	MIM	OXPHOS > Complex IV > CIV assembly factors | OXPHOS > OXPHOS assembly factors
MMAB	Matrix	Metabolism > Vitamin metabolism > Vitamin B12 metabolism
PPOX	MIM	Metabolism > Metals and cofactors > Heme synthesis and processing
ABCD3	Membrane	Small molecule transport > ABC transporters
SIRT3	Matrix	Metabolism > Metals and cofactors > NAD biosynthesis and metabolism | Signaling
LDHD	MIM	Metabolism > Carbohydrate metabolism
MRPL45	Matrix	Mitochondrial central dogma > Translation > Mitochondrial ribosome
C12orf65	Matrix	Mitochondrial central dogma > Translation > Translation factors
IMMP1L	MIM	Protein import, sorting and homeostasis > Protein import and sorting > Preprotein cleavage | Protein import, sorting and homeostasis > Protein homeostasis > Proteases
POLG	Matrix	Mitochondrial central dogma > mtDNA maintenance > mtDNA replication | Mitochondrial central dogma > mtDNA maintenance > mtDNA nucleoid | Mitochondrial central dogma > mtDNA maintenance > mtDNA repair
ATPAF1	Matrix	OXPHOS > Complex V > CV assembly factors | OXPHOS > OXPHOS assembly factors
BLOC1S1	unknown	Signaling
ALDH1L2	Matrix	Metabolism > Vitamin metabolism > Folate and 1-C metabolism
COX18	MIM	OXPHOS > Complex IV > CIV assembly factors | OXPHOS > OXPHOS assembly factors
CPOX	MIM	Metabolism > Metals and cofactors > Heme synthesis and processing
NNT	MIM	Metabolism > Metals and cofactors > NAD biosynthesis and metabolism
NDUFAF8	IMS	OXPHOS > Complex I > CI assembly factors | OXPHOS > OXPHOS assembly factors
ATP23	IMS	Protein import, sorting and homeostasis > Protein homeostasis > Proteases
DCAKD	Membrane	0
ATP5MF	MIM	OXPHOS > Complex V > CV subunits | OXPHOS > OXPHOS subunits
SFXN3	MIM	Metabolism > Amino acid metabolism > Serine metabolism | Metabolism > Vitamin metabolism > Folate and 1-C metabolism | Small molecule transport > Sideroflexins
AASS	Matrix	Metabolism > Amino acid metabolism > Lysine metabolism
DIABLO	IMS	Mitochondrial dynamics and surveillance > Apoptosis
COX8C	MIM	OXPHOS > Complex IV > CIV subunits | OXPHOS > OXPHOS subunits
PXMP2	MIM	0
AGXT2	Matrix	Metabolism > Amino acid metabolism > Glyoxylate metabolism
GLS2	Matrix	Metabolism > Amino acid metabolism > Glutamate metabolism
APOO	MIM	Mitochondrial dynamics and surveillance > Cristae formation > MICOS complex
ACAD11	MIM	Metabolism > Lipid metabolism > Fatty acid oxidation
C5orf63	Matrix	0
HOGA1	Matrix	Metabolism > Amino acid metabolism > Glyoxylate metabolism
TTC19	MIM	OXPHOS > Complex III > CIII assembly factors | OXPHOS > OXPHOS assembly factors
NGRN	Matrix	Mitochondrial central dogma > mtRNA metabolism > mt-rRNA modifications | Mitochondrial central dogma > Translation > Mitochondrial ribosome assembly
TCAIM	Matrix	0
GCSH	Matrix	Metabolism > Lipid metabolism > Lipoate insertion | Metabolism > Amino acid metabolism > Glycine metabolism | Metabolism > Amino acid metabolism > Glycine cleavage system
SIRT5	Matrix	Metabolism > Metals and cofactors > NAD biosynthesis and metabolism
GPT2	Matrix	Metabolism > Amino acid metabolism > Glutamate metabolism
TOMM6	MOM	Protein import, sorting and homeostasis > Protein import and sorting > TOM
FAM162A	MIM	0
ABCB6	MOM	Metabolism > Metals and cofactors > Heme synthesis and processing | Small molecule transport > ABC transporters
MACROD1	Matrix	Signaling
TST	Matrix	Metabolism > Detoxification > Xenobiotic metabolism | Metabolism > Sulfur metabolism
MT-CO1	MIM	OXPHOS > Complex IV > CIV subunits | Metabolism > Metals and cofactors > Heme-containing proteins | OXPHOS > OXPHOS subunits
MTFR1L	unknown	0
SDR39U1	unknown	0
DMGDH	Matrix	Metabolism > Amino acid metabolism > Glycine metabolism | Metabolism > Vitamin metabolism > Choline and betaine metabolism | Metabolism > Vitamin metabolism > Folate and 1-C metabolism
SLC25A14	MIM	Metabolism > Sulfur metabolism | Small molecule transport > SLC25A family
PRELID3A	IMS	Metabolism > Lipid metabolism > Cardiolipin synthesis | Metabolism > Lipid metabolism > Phospholipid metabolism
CHCHD5	IMS	0
TOMM70	MOM	Protein import, sorting and homeostasis > Protein import and sorting > TOM
NIT1	Matrix	Metabolism > Detoxification > ROS and glutathione metabolism
FAHD1	Matrix	Metabolism > Carbohydrate metabolism > TCA-associated
MCU	MIM	Signaling > Calcium homeostasis > Calcium cycle | Small molecule transport > Calcium uniporter
CYP27A1	MIM	Metabolism > Lipid metabolism > Cholesterol, bile acid, steroid synthesis | Metabolism > Metals and cofactors > Heme-containing proteins
MT-ND2	MIM	OXPHOS > Complex I > CI subunits | OXPHOS > OXPHOS subunits
MT-ND4	MIM	OXPHOS > Complex I > CI subunits | OXPHOS > OXPHOS subunits
MT-ND5	MIM	OXPHOS > Complex I > CI subunits | OXPHOS > OXPHOS subunits
DELE1	MIM	Signaling
FASTKD1	Matrix	Mitochondrial central dogma > mtRNA metabolism > mtRNA granules | Mitochondrial central dogma > mtRNA metabolism > Polycistronic mtRNA processing | Mitochondrial central dogma > mtRNA metabolism > mtRNA stability and decay
MRPS31	Matrix	Mitochondrial central dogma > Translation > Mitochondrial ribosome
ALDH1L1	Matrix	Metabolism > Vitamin metabolism > Folate and 1-C metabolism
PTCD1	Matrix	Mitochondrial central dogma > mtRNA metabolism > mtRNA granules
HADHB	MIM	Metabolism > Carbohydrate metabolism > Ketone metabolism | Metabolism > Lipid metabolism > Fatty acid oxidation | Metabolism > Amino acid metabolism > Lysine metabolism
TRIT1	Matrix	Mitochondrial central dogma > mtRNA metabolism > mt-tRNA modifications | Mitochondrial central dogma > mtRNA metabolism > mt-rRNA modifications
CRLS1	MIM	Metabolism > Lipid metabolism > Cardiolipin synthesis
GLYCTK	Matrix	Metabolism > Carbohydrate metabolism
SLC25A32	MIM	Metabolism > Vitamin metabolism > Vitamin B2 metabolism | Metabolism > Vitamin metabolism > Folate and 1-C metabolism | Small molecule transport > SLC25A family
AARS2	Matrix	Mitochondrial central dogma > Translation > mt-tRNA synthetases
EXOG	MIM	Mitochondrial central dogma > mtDNA maintenance > mtDNA replication | Mitochondrial central dogma > mtDNA maintenance > mtDNA repair | Mitochondrial central dogma > mtDNA maintenance > mtDNA stability and decay
CHCHD2	IMS	Mitochondrial dynamics and surveillance > Apoptosis
KMO	MOM	Metabolism > Amino acid metabolism > Kynurenine metabolism | Metabolism > Metals and cofactors > NAD biosynthesis and metabolism
SFXN5	MIM	Metabolism > Carbohydrate metabolism > TCA-associated | Small molecule transport > Sideroflexins
ELAC2	Matrix	Mitochondrial central dogma > mtRNA metabolism > Polycistronic mtRNA processing
GPX1	Matrix	Metabolism > Detoxification > ROS and glutathione metabolism | Metabolism > Detoxification > Selenoproteins
CPT1B	MOM	Metabolism > Lipid metabolism > Fatty acid oxidation | Metabolism > Metals and cofactors > Carnitine synthesis and transport | Metabolism > Metals and cofactors > Carnitine shuttle
FIS1	MOM	Mitochondrial dynamics and surveillance > Fission
PRELID1	IMS	Metabolism > Lipid metabolism > Cardiolipin synthesis | Metabolism > Lipid metabolism > Phospholipid metabolism
UCP3	MIM	Small molecule transport > SLC25A family
SLC25A27	MIM	Small molecule transport > SLC25A family
SLC25A40	MIM	Small molecule transport > SLC25A family
SLC25A23	MIM	Metabolism > Nucleotide metabolism > Nucleotide import | Signaling > Calcium homeostasis > EF hand proteins | Small molecule transport > SLC25A family
HEMK1	Matrix	Mitochondrial central dogma > Translation > Translation factors
SLC25A36	MIM	Metabolism > Nucleotide metabolism > Nucleotide import | Small molecule transport > SLC25A family
OMA1	MIM	Protein import, sorting and homeostasis > Protein homeostasis > Proteases | Mitochondrial dynamics and surveillance > Fusion | Mitochondrial dynamics and surveillance > Fission
LETM2	MIM	0
DHRS1	MIM	Metabolism > Lipid metabolism > Cholesterol, bile acid, steroid synthesis
STOM	Membrane	0
METTL5	Matrix	Mitochondrial central dogma > mtRNA metabolism > mt-rRNA modifications
MSRA	Matrix	Metabolism > Detoxification > ROS and glutathione metabolism | Metabolism > Sulfur metabolism
NUDT8	Matrix	Metabolism > Metals and cofactors > Coenzyme A metabolism
NMNAT3	Matrix	Metabolism > Metals and cofactors > NAD biosynthesis and metabolism
SLC25A38	MIM	Metabolism > Amino acid metabolism > Glycine metabolism | Metabolism > Metals and cofactors > Heme synthesis and processing | Metabolism > Vitamin metabolism > Folate and 1-C metabolism | Small molecule transport > SLC25A family
MPV17L2	MIM	Mitochondrial central dogma > Translation > Mitochondrial ribosome assembly
ACLY	Matrix	Metabolism > Carbohydrate metabolism > TCA-associated
ABCD2	Membrane	Small molecule transport > ABC transporters
FLAD1	Matrix	Metabolism > Vitamin metabolism > Vitamin B2 metabolism
LIPT1	Matrix	Metabolism > Lipid metabolism > Lipoate insertion
DGLUCY	Matrix	Metabolism > Amino acid metabolism
PCK2	Matrix	Metabolism > Carbohydrate metabolism > Gluconeogenesis | Metabolism > Carbohydrate metabolism > TCA-associated
NADK2	Matrix	Metabolism > Metals and cofactors > NAD biosynthesis and metabolism
MPST	MIM	Metabolism > Detoxification > Xenobiotic metabolism | Metabolism > Sulfur metabolism
NUDT13	Matrix	Metabolism > Metals and cofactors > NAD biosynthesis and metabolism
ACACA	Matrix	Metabolism > Lipid metabolism > Type II fatty acid synthesis | Metabolism > Vitamin metabolism > Biotin utilizing proteins
ABAT	Matrix	Metabolism > Amino acid metabolism > GABA metabolism | Metabolism > Metals and cofactors > Fe-S-containing proteins
HMGCS2	Matrix	Metabolism > Carbohydrate metabolism > Ketone metabolism
ALDH5A1	Matrix	Metabolism > Amino acid metabolism > GABA metabolism
CKMT1A	MIM	Metabolism > Nucleotide metabolism > Creatine metabolism
PISD	MIM	Metabolism > Lipid metabolism > Phospholipid metabolism
NDUFB4	MIM	OXPHOS > Complex I > CI subunits | OXPHOS > OXPHOS subunits
UQCR11	MIM	OXPHOS > Complex III > CIII subunits | OXPHOS > OXPHOS subunits
FAM136A	IMS	0
TOMM5	MOM	Protein import, sorting and homeostasis > Protein import and sorting > TOM
HTRA2	MIM	Protein import, sorting and homeostasis > Protein homeostasis > Proteases | Mitochondrial dynamics and surveillance > Apoptosis
NDUFA1	MIM	OXPHOS > Complex I > CI subunits | OXPHOS > OXPHOS subunits
MT-CYB	MIM	OXPHOS > Complex III > CIII subunits | Metabolism > Metals and cofactors > Heme-containing proteins | Metabolism > Electron carriers > Cytochromes | OXPHOS > OXPHOS subunits
GUK1	Matrix	Metabolism > Nucleotide metabolism > Nucleotide synthesis and processing
D2HGDH	Matrix	Metabolism > Carbohydrate metabolism > TCA-associated
OPA3	MOM	0
AKR1B10	unknown	Metabolism > Vitamin metabolism > Vitamin A metabolism | Metabolism > Detoxification > Xenobiotic metabolism
PHYH	Matrix	Metabolism > Lipid metabolism
NDUFAF2	MIM	OXPHOS > Complex I > CI assembly factors | OXPHOS > OXPHOS assembly factors
ECSIT	MIM	OXPHOS > Complex I > CI assembly factors | OXPHOS > OXPHOS assembly factors
PARL	MIM	Protein import, sorting and homeostasis > Protein homeostasis > Proteases | Mitochondrial dynamics and surveillance > Mitophagy | Mitochondrial dynamics and surveillance > Autophagy
MRPL42	Matrix	Mitochondrial central dogma > Translation > Mitochondrial ribosome
DNAJC4	Membrane	Protein import, sorting and homeostasis > Protein homeostasis
PAM16	MIM	Protein import, sorting and homeostasis > Protein import and sorting > Import motor
ALDH3A2	Membrane	Metabolism > Detoxification > ROS and glutathione metabolism
ACSL6	MOM	Metabolism > Lipid metabolism > Fatty acid oxidation
MRS2	MIM	Small molecule transport | Signaling
ABHD10	Matrix	Metabolism > Detoxification > Xenobiotic metabolism
HINT3	unknown	0
PXMP4	unknown	0
OSGEPL1	Matrix	Mitochondrial central dogma > mtRNA metabolism > mt-tRNA modifications
NUDT2	Matrix	Metabolism > Nucleotide metabolism > Nucleotide synthesis and processing
CYB5B	MOM	Metabolism > Metals and cofactors > Heme-containing proteins | Metabolism > Detoxification > Xenobiotic metabolism | Metabolism > Detoxification > Amidoxime reducing complex | Metabolism > Electron carriers > Cytochromes
GRSF1	Matrix	Mitochondrial central dogma > mtRNA metabolism > mtRNA granules | Mitochondrial central dogma > mtRNA metabolism > Polycistronic mtRNA processing | Mitochondrial central dogma > mtRNA metabolism > mtRNA stability and decay | Mitochondrial central dogma > Translation > Mitochondrial ribosome assembly
MRPS18B	Matrix	Mitochondrial central dogma > Translation > Mitochondrial ribosome
DNAJC30	MIM	0
CAT	IMS	Metabolism > Detoxification > ROS and glutathione metabolism
DGUOK	Matrix	Metabolism > Nucleotide metabolism > Nucleotide synthesis and processing
ACOT9	MIM	Metabolism > Lipid metabolism
ACSS1	MIM	Metabolism > Lipid metabolism > Fatty acid oxidation
RFK	Matrix	Metabolism > Vitamin metabolism > Vitamin B2 metabolism
STARD7	IMS	Metabolism > Lipid metabolism > Phospholipid metabolism | Small molecule transport
CHPT1	MIM	Metabolism > Lipid metabolism > Phospholipid metabolism
MT-ATP8	MIM	OXPHOS > Complex V > CV subunits | OXPHOS > OXPHOS subunits
TIMMDC1	MIM	OXPHOS > Complex I > CI assembly factors | OXPHOS > OXPHOS assembly factors
SPATA19	unknown	0
HTATIP2	Membrane	0
AKR7A2	Matrix	Metabolism > Amino acid metabolism > GABA metabolism | Metabolism > Detoxification > Xenobiotic metabolism
DUT	Matrix	Metabolism > Nucleotide metabolism > Nucleotide synthesis and processing
MT-CO3	MIM	OXPHOS > Complex IV > CIV subunits | OXPHOS > OXPHOS subunits
DHRS7B	Membrane	0
MTRF1	Matrix	Mitochondrial central dogma > Translation > Translation factors
TMEM143	MIM	0
NT5M	Matrix	Metabolism > Nucleotide metabolism > Nucleotide synthesis and processing
RHOT1	MOM	Signaling > Calcium homeostasis > EF hand proteins | Mitochondrial dynamics and surveillance > Trafficking
NME4	MIM	Metabolism > Nucleotide metabolism > Nucleotide synthesis and processing
MTHFS	Matrix	Metabolism > Vitamin metabolism > Folate and 1-C metabolism
TIMM29	MIM	Protein import, sorting and homeostasis > Protein import and sorting > TIM22 carrier pathway
PNPO	Matrix	Metabolism > Vitamin metabolism > Vitamin B6 metabolism
MICU2	MIM	Signaling > Calcium homeostasis > Calcium cycle | Signaling > Calcium homeostasis > EF hand proteins | Small molecule transport > Calcium uniporter
PCBD2	unknown	Metabolism > Metals and cofactors > Tetrahydobiopterin synthesis
QRSL1	Matrix	Mitochondrial central dogma > Translation > mt-tRNA synthetases
ADCK1	unknown	0
PRDX6	unknown	Metabolism > Lipid metabolism > Phospholipid metabolism | Metabolism > Detoxification > ROS and glutathione metabolism
NIPSNAP1	Matrix	Mitochondrial dynamics and surveillance > Mitophagy | Mitochondrial dynamics and surveillance > Autophagy
GARS1	Matrix	Mitochondrial central dogma > Translation > mt-tRNA synthetases
ACSM2A	Matrix	Metabolism > Lipid metabolism > Fatty acid oxidation | Metabolism > Detoxification > Xenobiotic metabolism
SLC25A33	MIM	Metabolism > Nucleotide metabolism > Nucleotide import | Small molecule transport > SLC25A family
LYRM9	unknown	0
RAB24	MOM	Mitochondrial dynamics and surveillance > Fission | Mitochondrial dynamics and surveillance > Autophagy
PARS2	Matrix	Mitochondrial central dogma > Translation > mt-tRNA synthetases
MRPL52	Matrix	Mitochondrial central dogma > Translation > Mitochondrial ribosome
PUS1	Matrix	Mitochondrial central dogma > mtRNA metabolism > mtRNA granules | Mitochondrial central dogma > mtRNA metabolism > mt-tRNA modifications
GOT2	MIM	Metabolism > Carbohydrate metabolism > Malate-aspartate shuttle | Metabolism > Amino acid metabolism > Glutamate metabolism | Metabolism > Amino acid metabolism > Glyoxylate metabolism | Metabolism > Amino acid metabolism > Kynurenine metabolism | Metabolism > Sulfur metabolism
NAXD	MIM	Metabolism > Metals and cofactors > NAD biosynthesis and metabolism
MT-ND3	MIM	OXPHOS > Complex I > CI subunits | OXPHOS > OXPHOS subunits
ACCS	unknown	0
PTRH2	MOM	0
PGS1	MIM	Metabolism > Lipid metabolism > Cardiolipin synthesis | Metabolism > Lipid metabolism > Phospholipid metabolism
OXR1	MOM	Metabolism > Detoxification > ROS and glutathione metabolism
LYPLAL1	unknown	Metabolism > Lipid metabolism
DNAJC28	unknown	0
FPGS	Matrix	Metabolism > Vitamin metabolism > Folate and 1-C metabolism
TMEM205	Membrane	0
SLC25A53	MIM	Small molecule transport > SLC25A family
AIFM3	MIM	Metabolism > Metals and cofactors > Fe-S-containing proteins | Mitochondrial dynamics and surveillance > Apoptosis
MGST1	Membrane	Metabolism > Detoxification > Xenobiotic metabolism | Metabolism > Detoxification > ROS and glutathione metabolism
MTFP1	Membrane	Mitochondrial dynamics and surveillance > Fission
COA4	IMS	OXPHOS > Complex IV > CIV assembly factors | OXPHOS > OXPHOS assembly factors
NIF3L1	Matrix	0
PUSL1	Matrix	Mitochondrial central dogma > Translation
SDSL	unknown	Metabolism > Amino acid metabolism > Serine metabolism
BAX	MOM	Mitochondrial dynamics and surveillance > Apoptosis
MAVS	MOM	Signaling > Immune response
METTL17	Matrix	Mitochondrial central dogma > mtRNA metabolism > mt-rRNA modifications | Mitochondrial central dogma > Translation > Mitochondrial ribosome assembly
ACACB	MOM	Metabolism > Lipid metabolism > Fatty acid oxidation | Metabolism > Vitamin metabolism > Biotin utilizing proteins
ARG2	Matrix	Metabolism > Amino acid metabolism
MTPAP	Matrix	Mitochondrial central dogma > mtRNA metabolism > mtRNA granules | Mitochondrial central dogma > mtRNA metabolism > mt-rRNA modifications | Mitochondrial central dogma > mtRNA metabolism > mt-mRNA modifications | Mitochondrial central dogma > mtRNA metabolism > mtRNA stability and decay
CCDC51	MIM	Small molecule transport
SUGCT	Matrix	Metabolism > Amino acid metabolism
DNM1L	MOM	Mitochondrial dynamics and surveillance > Fission
NRDC	Matrix	Protein import, sorting and homeostasis > Protein homeostasis > Chaperones | Protein import, sorting and homeostasis > Protein import and sorting
TMEM126B	MIM	OXPHOS > Complex I > CI assembly factors | OXPHOS > OXPHOS assembly factors
NSUN4	Matrix	Mitochondrial central dogma > mtRNA metabolism > mt-rRNA modifications | Mitochondrial central dogma > Translation > Mitochondrial ribosome assembly
ACSS3	Matrix	Metabolism > Lipid metabolism
FAM210B	MIM	Metabolism > Metals and cofactors > Iron homeostasis
RBFA	Matrix	Mitochondrial central dogma > Translation > Mitochondrial ribosome assembly
METAP1D	Matrix	Mitochondrial central dogma > Translation > fMet processing | Protein import, sorting and homeostasis > Protein homeostasis > Proteases
AHCYL1	MOM	Mitochondrial dynamics and surveillance > Organelle contact sites
NIPSNAP3A	Matrix	0
MTARC1	MOM	Metabolism > Metals and cofactors > Molybdenum cofactor synthesis and proteins | Metabolism > Detoxification > Xenobiotic metabolism | Metabolism > Detoxification > Amidoxime reducing complex
FUNDC1	MOM	Mitochondrial dynamics and surveillance > Mitophagy | Mitochondrial dynamics and surveillance > Autophagy
ACSL1	MOM	Metabolism > Lipid metabolism > Fatty acid oxidation
COX20	MIM	OXPHOS > Complex IV > CIV assembly factors | OXPHOS > OXPHOS assembly factors
HSDL1	unknown	0
CBR3	Matrix	Metabolism > Detoxification > Xenobiotic metabolism
MTERF4	Matrix	Mitochondrial central dogma > Translation > Mitochondrial ribosome assembly
NUDT19	Matrix	Metabolism > Metals and cofactors > Coenzyme A metabolism
HEBP1	IMS	0
PTPMT1	MIM	Metabolism > Lipid metabolism > Cardiolipin synthesis | Metabolism > Lipid metabolism > Phospholipid metabolism
PGAM5	MOM	Mitochondrial dynamics and surveillance > Mitophagy | Mitochondrial dynamics and surveillance > Autophagy
DTYMK	Matrix	Metabolism > Nucleotide metabolism > Nucleotide synthesis and processing
KARS1	Matrix	Mitochondrial central dogma > Translation > mt-tRNA synthetases
STAR	MOM|IMS	Metabolism > Lipid metabolism > Cholesterol, bile acid, steroid synthesis
DNAJC19	MIM	Protein import, sorting and homeostasis > Protein import and sorting > Import motor
OTC	Matrix	Metabolism > Amino acid metabolism > Urea cycle
COX7A2L	MIM	OXPHOS > Complex IV > CIV subunits | OXPHOS > OXPHOS subunits | OXPHOS > OXPHOS assembly factors | OXPHOS > Respirasome assembly
MTERF3	Matrix	Mitochondrial central dogma > Translation > Mitochondrial ribosome assembly
SFXN2	MIM	Small molecule transport > Sideroflexins
FASN	IMS	Metabolism > Lipid metabolism
PINK1	MOM	Mitochondrial dynamics and surveillance > Mitophagy | Mitochondrial dynamics and surveillance > Autophagy | Signaling
TMEM177	MIM	OXPHOS > Complex IV > CIV assembly factors | OXPHOS > OXPHOS assembly factors
TXNRD1	unknown	Metabolism > Detoxification > ROS and glutathione metabolism | Metabolism > Detoxification > Selenoproteins
THNSL1	Matrix	0
FDPS	MIM	Metabolism > Lipid metabolism > Cholesterol-associated
IDI1	Matrix	Metabolism > Lipid metabolism > Cholesterol-associated
TOP3A	Matrix	Mitochondrial central dogma > mtDNA maintenance > mtDNA replication
FTMT	Matrix	Metabolism > Metals and cofactors > Iron homeostasis
LDHAL6B	Matrix	Metabolism > Carbohydrate metabolism
MTFR1	Membrane	Mitochondrial dynamics and surveillance > Fission
BCL2L13	MOM	Mitochondrial dynamics and surveillance > Mitophagy | Mitochondrial dynamics and surveillance > Autophagy | Mitochondrial dynamics and surveillance > Apoptosis
TRMT10C	Matrix	Mitochondrial central dogma > mtRNA metabolism > mtRNA granules | Mitochondrial central dogma > mtRNA metabolism > Polycistronic mtRNA processing | Mitochondrial central dogma > mtRNA metabolism > mt-tRNA modifications
ACOT7	Matrix	Metabolism > Lipid metabolism
TFB1M	Matrix	Mitochondrial central dogma > mtRNA metabolism > mtRNA granules | Mitochondrial central dogma > mtRNA metabolism > mt-rRNA modifications | Mitochondrial central dogma > Translation > Mitochondrial ribosome assembly
ARF5	unknown	0
MCUB	MIM	Signaling > Calcium homeostasis > Calcium cycle | Small molecule transport > Calcium uniporter
TWNK	Matrix	Mitochondrial central dogma > mtDNA maintenance > mtDNA replication | Mitochondrial central dogma > mtDNA maintenance > mtDNA nucleoid
MMADHC	Matrix	Metabolism > Vitamin metabolism > Vitamin B12 metabolism
PYCR2	Matrix	Metabolism > Amino acid metabolism > Proline metabolism
TSTD1	unknown	Metabolism > Sulfur metabolism
LYRM1	unknown	0
OSBPL1A	unknown	Metabolism > Lipid metabolism > Cholesterol, bile acid, steroid synthesis | Metabolism > Lipid metabolism > Phospholipid metabolism
RECQL4	Matrix	Mitochondrial central dogma > mtDNA maintenance > mtDNA repair
PET100	MIM	OXPHOS > Complex IV > CIV assembly factors | OXPHOS > OXPHOS assembly factors
GDAP1	MOM	0
MTIF3	Matrix	Mitochondrial central dogma > Translation > Translation factors
UNG	Matrix	Mitochondrial central dogma > mtDNA maintenance > mtDNA repair
GLYAT	Matrix	Metabolism > Amino acid metabolism > Glycine metabolism | Metabolism > Detoxification > Xenobiotic metabolism
ISOC2	Matrix	0
ATP5MC1	MIM	OXPHOS > Complex V > CV subunits | OXPHOS > OXPHOS subunits
QDPR	Matrix	Metabolism > Metals and cofactors > Tetrahydobiopterin synthesis | Metabolism > Vitamin metabolism > Folate and 1-C metabolism
COQ8B	MIM	Metabolism > Metals and cofactors > Coenzyme Q metabolism
GTPBP10	Matrix	Mitochondrial central dogma > Translation > Mitochondrial ribosome assembly
TSPO	MOM	Metabolism > Lipid metabolism > Cholesterol, bile acid, steroid synthesis
FTH1	unknown	Metabolism > Metals and cofactors > Iron homeostasis
TRMT1	Matrix	Mitochondrial central dogma > mtRNA metabolism > mt-tRNA modifications
ADCK2	MIM	0
TSTD3	unknown	0
MRPS36	Matrix	Mitochondrial central dogma > Translation > Mitochondrial ribosome | Metabolism > Carbohydrate metabolism > TCA cycle
PDP2	Matrix	Metabolism > Carbohydrate metabolism > Pyruvate metabolism
AGPAT5	MOM	Metabolism > Lipid metabolism > Cardiolipin synthesis | Metabolism > Lipid metabolism > Phospholipid metabolism
MCRIP2	unknown	Signaling
UCP2	MIM	Small molecule transport > SLC25A family
SLC25A37	MIM	Metabolism > Metals and cofactors > Iron homeostasis | Small molecule transport > SLC25A family
SLC25A28	MIM	Metabolism > Metals and cofactors > Iron homeostasis | Small molecule transport > SLC25A family
SLC25A48	MIM	Small molecule transport > SLC25A family
SLC25A43	MIM	Small molecule transport > SLC25A family
SLC25A47	MIM	Small molecule transport > SLC25A family
SLC25A41	MIM	Metabolism > Nucleotide metabolism > Nucleotide import | Small molecule transport > SLC25A family
SLC25A34	MIM	Small molecule transport > SLC25A family
EPHX2	unknown	Metabolism > Detoxification > Xenobiotic metabolism | Metabolism > Lipid metabolism
NUDT5	unknown	Metabolism > Nucleotide metabolism > Nucleotide synthesis and processing
MICU1	MIM	Signaling > Calcium homeostasis > Calcium cycle | Signaling > Calcium homeostasis > EF hand proteins | Small molecule transport > Calcium uniporter
SOD1	IMS	Metabolism > Detoxification > ROS and glutathione metabolism
SERHL2	unknown	0
NDUFAF3	MIM	OXPHOS > Complex I > CI assembly factors | OXPHOS > OXPHOS assembly factors
BOLA3	Matrix	Metabolism > Metals and cofactors > Fe-S cluster biosynthesis | Metabolism > Metals and cofactors > Fe-S-containing proteins
OCIAD2	unknown	Signaling
RSAD1	MIM	Metabolism > Metals and cofactors > Fe-S-containing proteins
CHCHD6	MIM	Mitochondrial dynamics and surveillance > Cristae formation > MICOS complex
FASTKD2	Matrix	Mitochondrial central dogma > mtRNA metabolism > mtRNA granules | Mitochondrial central dogma > mtRNA metabolism > Polycistronic mtRNA processing | Mitochondrial central dogma > mtRNA metabolism > mtRNA stability and decay | Mitochondrial central dogma > Translation > Mitochondrial ribosome assembly
PEX11B	Membrane	0
TMEM186	MIM	OXPHOS > Complex I > CI assembly factors | OXPHOS > OXPHOS assembly factors
PIF1	Matrix	Mitochondrial central dogma > mtDNA maintenance
FABP1	unknown	Metabolism > Metals and cofactors > Heme synthesis and processing | Metabolism > Lipid metabolism
ABCD1	Membrane	Small molecule transport > ABC transporters
PLPBP	Matrix	Metabolism > Vitamin metabolism > Vitamin B6 metabolism
DBI	unknown	Metabolism > Lipid metabolism
PNPT1	Matrix|IMS	Mitochondrial central dogma > mtRNA metabolism > mtRNA stability and decay
TOP1MT	Matrix	Mitochondrial central dogma > mtDNA maintenance > mtDNA replication | Mitochondrial central dogma > mtRNA metabolism > Transcription
RNASEH1	Matrix	Mitochondrial central dogma > mtDNA maintenance > mtDNA replication | Mitochondrial central dogma > mtRNA metabolism > mtRNA stability and decay
ABCA9	Membrane	Small molecule transport > ABC transporters
SCP2	MIM	Metabolism > Lipid metabolism > Cholesterol, bile acid, steroid synthesis
NT5DC3	Matrix	0
CMC4	IMS	0
LDHB	unknown	Metabolism > Amino acid metabolism > Glyoxylate metabolism
YBEY	Matrix	Mitochondrial central dogma > mtRNA metabolism > Polycistronic mtRNA processing | Mitochondrial central dogma > Translation > Mitochondrial ribosome assembly
HINT1	unknown	Metabolism > Nucleotide metabolism > Nucleotide synthesis and processing
MUL1	MOM	Protein import, sorting and homeostasis > Protein homeostasis | Mitochondrial dynamics and surveillance > Fission | Signaling
TK2	Matrix	Metabolism > Nucleotide metabolism > Nucleotide synthesis and processing
AGMAT	Matrix	Metabolism > Amino acid metabolism
CMPK2	Matrix	Metabolism > Nucleotide metabolism > Nucleotide synthesis and processing
BID	MOM	Mitochondrial dynamics and surveillance > Apoptosis
ARL2	IMS	Mitochondrial dynamics and surveillance > Fusion
SYNJ2BP	MOM	Mitochondrial dynamics and surveillance > Organelle contact sites
MFF	MOM	Mitochondrial dynamics and surveillance > Fission
DCXR	Matrix	Metabolism > Carbohydrate metabolism
NUDT9	Matrix	Metabolism > Nucleotide metabolism > Nucleotide synthesis and processing
AMACR	Matrix	Metabolism > Lipid metabolism > Fatty acid oxidation
VPS13D	MOM	Mitochondrial dynamics and surveillance > Mitophagy | Mitochondrial dynamics and surveillance > Autophagy
NUDT6	Matrix	0
DMAC2	MIM	OXPHOS > Complex I > CI assembly factors | OXPHOS > OXPHOS assembly factors
MRM2	Matrix	Mitochondrial central dogma > mtRNA metabolism > mtRNA granules | Mitochondrial central dogma > mtRNA metabolism > mt-rRNA modifications | Mitochondrial central dogma > Translation > Mitochondrial ribosome assembly
BAK1	MOM	Mitochondrial dynamics and surveillance > Apoptosis
DHODH	MIM	Metabolism > Nucleotide metabolism > Nucleotide synthesis and processing | Metabolism > Electron carriers > Q-linked reactions, other
MAOB	MOM	Metabolism > Amino acid metabolism > Catechol metabolism | Metabolism > Detoxification > Xenobiotic metabolism
MGST3	MOM	Metabolism > Lipid metabolism > Eicosanoid metabolism
ACP6	IMS	Metabolism > Lipid metabolism > Phospholipid metabolism
MRPL48	Matrix	Mitochondrial central dogma > Translation > Mitochondrial ribosome
AGXT	Matrix	Metabolism > Amino acid metabolism > Serine metabolism | Metabolism > Amino acid metabolism > Glyoxylate metabolism
CYB5R3	MOM	Metabolism > Detoxification > Xenobiotic metabolism | Metabolism > Detoxification > Amidoxime reducing complex | Metabolism > Lipid metabolism
DDX28	Matrix	Mitochondrial central dogma > mtRNA metabolism > mtRNA granules | Mitochondrial central dogma > Translation > Mitochondrial ribosome assembly
PNKD	MIM	OXPHOS > Complex IV > CIV assembly factors | OXPHOS > OXPHOS assembly factors
MICU3	MIM	Signaling > Calcium homeostasis > Calcium cycle | Signaling > Calcium homeostasis > EF hand proteins | Small molecule transport > Calcium uniporter
BNIP3	MOM	Mitochondrial dynamics and surveillance > Apoptosis
MTX3	MOM	Mitochondrial dynamics and surveillance > Intramitochondrial membrane interactions
MUTYH	Matrix	Mitochondrial central dogma > mtDNA maintenance
GTPBP6	Matrix	0
CYP11A1	MIM	Metabolism > Lipid metabolism > Cholesterol, bile acid, steroid synthesis | Metabolism > Metals and cofactors > Heme-containing proteins
OCIAD1	MOM	0
METTL8	Matrix	Mitochondrial central dogma > mtRNA metabolism
SMIM20	MIM	OXPHOS > Complex IV > CIV assembly factors | OXPHOS > OXPHOS assembly factors
RPUSD4	Matrix	Mitochondrial central dogma > mtRNA metabolism > mtRNA granules | Mitochondrial central dogma > mtRNA metabolism > mt-tRNA modifications | Mitochondrial central dogma > mtRNA metabolism > mt-rRNA modifications
SMIM8	MOM	0
NME6	Matrix	Metabolism > Nucleotide metabolism > Nucleotide synthesis and processing
FKBP8	MOM	Mitochondrial dynamics and surveillance > Organelle contact sites | Mitochondrial dynamics and surveillance > Mitophagy | Mitochondrial dynamics and surveillance > Autophagy
ACSM4	Matrix	Metabolism > Lipid metabolism > Fatty acid oxidation
NLRX1	Matrix	Signaling > Immune response
FOXRED1	MIM	OXPHOS > Complex I > CI assembly factors | OXPHOS > OXPHOS assembly factors
TFB2M	Matrix	Mitochondrial central dogma > mtDNA maintenance > mtDNA replication | Mitochondrial central dogma > mtRNA metabolism > Transcription
PPM1K	Matrix	Metabolism > Amino acid metabolism > Branched-chain amino acid metabolism | Metabolism > Amino acid metabolism > Branched-chain amino acid dehydrogenase complex
ATP5MC2	MIM	OXPHOS > Complex V > CV subunits | OXPHOS > OXPHOS subunits
MT-ND1	MIM	OXPHOS > Complex I > CI subunits | OXPHOS > OXPHOS subunits
TAZ	IMS	Metabolism > Lipid metabolism > Cardiolipin synthesis
MSRB3	unknown	Metabolism > Detoxification > ROS and glutathione metabolism
ACOT11	Matrix	Metabolism > Lipid metabolism > Fatty acid oxidation
NIPSNAP3B	Matrix	0
NTHL1	unknown	Metabolism > Metals and cofactors > Fe-S-containing proteins
MARCHF5	MOM	Mitochondrial dynamics and surveillance > Mitophagy | Mitochondrial dynamics and surveillance > Autophagy
SFXN4	MIM	Small molecule transport > Sideroflexins
TRMT5	Matrix	Mitochondrial central dogma > mtRNA metabolism > mt-tRNA modifications
SLC25A6	MIM	Metabolism > Nucleotide metabolism > Nucleotide import | Signaling > Calcium homeostasis > Mitochondrial permeability transition pore | Small molecule transport > SLC25A family
SLC25A52	MIM	Metabolism > Metals and cofactors > NAD biosynthesis and metabolism | Small molecule transport > SLC25A family
OGG1	Matrix	Mitochondrial central dogma > mtDNA maintenance > mtDNA repair
ACOD1	Matrix	Metabolism > Carbohydrate metabolism > Itaconate metabolism | Signaling > Immune response
QTRT1	Matrix	Mitochondrial central dogma > mtRNA metabolism > mt-tRNA modifications
AIFM2	Membrane	Metabolism > Detoxification > ROS and glutathione metabolism | Mitochondrial dynamics and surveillance > Apoptosis
PRDX2	unknown	Metabolism > Detoxification > ROS and glutathione metabolism
FBXL4	IMS	0
GPAM	Membrane	Metabolism > Lipid metabolism > Cardiolipin synthesis | Metabolism > Lipid metabolism > Phospholipid metabolism
DMAC2L	MIM	OXPHOS > Complex V > CV subunits | OXPHOS > OXPHOS subunits
RMDN3	MOM	Mitochondrial dynamics and surveillance > Organelle contact sites
PRXL2A	Membrane	Metabolism > Detoxification > ROS and glutathione metabolism
ATP5MD	MIM	OXPHOS > Complex V > CV subunits | OXPHOS > OXPHOS subunits | Mitochondrial dynamics and surveillance > Cristae formation
PET117	MIM	OXPHOS > Complex IV > CIV assembly factors | OXPHOS > OXPHOS assembly factors
MAOA	MOM	Metabolism > Amino acid metabolism > Catechol metabolism | Metabolism > Detoxification > Xenobiotic metabolism
C15orf61	Matrix	0
POLQ	Matrix	Mitochondrial central dogma > mtDNA maintenance
BCO2	MIM	Metabolism > Vitamin metabolism > Vitamin A metabolism
IFI27	Membrane	Signaling > Immune response | Mitochondrial dynamics and surveillance > Apoptosis
CRYZ	Matrix	0
PYCR1	Matrix	Metabolism > Amino acid metabolism > Proline metabolism
TMLHE	Matrix	Metabolism > Metals and cofactors > Carnitine synthesis and transport
TOMM20	MOM	Protein import, sorting and homeostasis > Protein import and sorting > TOM | Mitochondrial dynamics and surveillance
YRDC	Matrix	Mitochondrial central dogma > mtRNA metabolism > mt-tRNA modifications
COA7	IMS	OXPHOS > Complex IV > CIV assembly factors | OXPHOS > OXPHOS assembly factors
DHRS2	Matrix	Metabolism > Detoxification > Xenobiotic metabolism
MMAA	Matrix	Metabolism > Vitamin metabolism > Vitamin B12 metabolism
MIEF1	MOM|Matrix	Mitochondrial central dogma > Translation > Mitochondrial ribosome assembly | Mitochondrial dynamics and surveillance > Fission
C15orf48	Membrane	0
LIG3	Matrix	Mitochondrial central dogma > mtDNA maintenance > mtDNA replication | Mitochondrial central dogma > mtDNA maintenance > mtDNA repair
BNIP3L	MOM	Mitochondrial dynamics and surveillance > Apoptosis
FASTKD5	Matrix	Mitochondrial central dogma > mtRNA metabolism > mtRNA granules | Mitochondrial central dogma > mtRNA metabolism > Polycistronic mtRNA processing | Mitochondrial central dogma > mtRNA metabolism > mtRNA stability and decay
PARK7	MOM	Protein import, sorting and homeostasis > Protein homeostasis | Mitochondrial dynamics and surveillance > Mitophagy | Mitochondrial dynamics and surveillance > Autophagy
COA1	MIM	OXPHOS > Complex I > CI assembly factors | OXPHOS > Complex IV > CIV assembly factors | OXPHOS > OXPHOS assembly factors
COX7B2	MIM	OXPHOS > Complex IV > CIV subunits | OXPHOS > OXPHOS subunits
MT-ND4L	MIM	OXPHOS > Complex I > CI subunits | OXPHOS > OXPHOS subunits
SIRT4	Matrix	Metabolism > Metals and cofactors > NAD biosynthesis and metabolism
UQCC2	MIM	OXPHOS > Complex III > CIII assembly factors | OXPHOS > OXPHOS assembly factors
USP30	MOM	Protein import, sorting and homeostasis > Protein homeostasis > Proteases | Mitochondrial dynamics and surveillance > Mitophagy | Mitochondrial dynamics and surveillance > Autophagy
PDE12	Matrix	Mitochondrial central dogma > mtRNA metabolism > mt-mRNA modifications | Mitochondrial central dogma > mtRNA metabolism > mtRNA stability and decay
NME3	MOM	Metabolism > Nucleotide metabolism > Nucleotide synthesis and processing
DHX30	Matrix	Mitochondrial central dogma > mtRNA metabolism > mtRNA granules | Mitochondrial central dogma > Translation > Mitochondrial ribosome assembly
FASTK	MIM	Mitochondrial central dogma > mtRNA metabolism > mtRNA granules | Mitochondrial central dogma > mtRNA metabolism > Polycistronic mtRNA processing | Mitochondrial central dogma > mtRNA metabolism > mtRNA stability and decay
METTL15	Matrix	Mitochondrial central dogma > mtRNA metabolism > mt-rRNA modifications
CYP24A1	MIM	Metabolism > Metals and cofactors > Heme-containing proteins | Metabolism > Vitamin metabolism > Vitamin D metabolism
NOCT	Matrix	Metabolism > Metals and cofactors > NAD biosynthesis and metabolism
PANK2	IMS	Metabolism > Metals and cofactors > Coenzyme A metabolism
CA5A	Matrix	Metabolism > Amino acid metabolism > Urea cycle
NT5DC2	Matrix	Metabolism > Nucleotide metabolism > Nucleotide synthesis and processing
ATAD3B	MIM	Mitochondrial central dogma > mtDNA maintenance > mtDNA nucleoid | Mitochondrial dynamics and surveillance > Organelle contact sites | Mitochondrial dynamics and surveillance > Intramitochondrial membrane interactions
TRUB2	Matrix	Mitochondrial central dogma > mtRNA metabolism > mtRNA granules | Mitochondrial central dogma > mtRNA metabolism > mt-rRNA modifications
PRKACA	MIM	Signaling > cAMP-PKA signaling
COMTD1	Membrane	0
CPT1C	MOM	Metabolism > Lipid metabolism > Fatty acid oxidation | Metabolism > Metals and cofactors > Carnitine synthesis and transport | Metabolism > Metals and cofactors > Carnitine shuttle
C3orf33	Matrix	0
MIGA2	MOM	Mitochondrial dynamics and surveillance > Fusion | Mitochondrial dynamics and surveillance > Organelle contact sites
SND1	unknown	0
GLUD2	Matrix	Metabolism > Amino acid metabolism > Glutamate metabolism | Metabolism > Amino acid metabolism > GABA metabolism
HPDL	unknown	0
ANGEL2	Matrix	Mitochondrial central dogma > mtRNA metabolism > mt-mRNA modifications
ANTKMT	MIM	Metabolism > Nucleotide metabolism
UQCC3	MIM	OXPHOS > Complex III > CIII assembly factors | OXPHOS > OXPHOS assembly factors
PRDX4	IMS	Metabolism > Detoxification > ROS and glutathione metabolism
CDK5RAP1	Matrix	Mitochondrial central dogma > mtRNA metabolism > mt-tRNA modifications
PAICS	Matrix	Metabolism > Nucleotide metabolism > Nucleotide synthesis and processing
MGARP	Membrane	Mitochondrial dynamics and surveillance > Trafficking
HDHD3	Matrix	0
CYP11B2	MIM	Metabolism > Lipid metabolism > Cholesterol, bile acid, steroid synthesis | Metabolism > Metals and cofactors > Heme-containing proteins
AGPAT4	MOM	Metabolism > Lipid metabolism > Cardiolipin synthesis | Metabolism > Lipid metabolism > Phospholipid metabolism
RCC1L	Matrix	Mitochondrial central dogma > mtRNA metabolism > mt-rRNA modifications
FAM185A	Matrix	0
PMAIP1	MOM	Mitochondrial dynamics and surveillance > Apoptosis
TDRKH	Membrane	0
SLC8B1	MIM	Signaling > Calcium homeostasis > Calcium cycle | Small molecule transport
CYP27B1	MIM	Metabolism > Metals and cofactors > Heme-containing proteins | Metabolism > Vitamin metabolism > Vitamin D metabolism
POLG2	Matrix	Mitochondrial central dogma > mtDNA maintenance > mtDNA replication | Mitochondrial central dogma > mtDNA maintenance > mtDNA nucleoid
THEM5	Matrix	Metabolism > Lipid metabolism
BIK	MOM	Mitochondrial dynamics and surveillance > Apoptosis
MTERF1	Matrix	Mitochondrial central dogma > mtDNA maintenance > mtDNA nucleoid | Mitochondrial central dogma > mtRNA metabolism > Transcription
MTFR2	Membrane	Mitochondrial dynamics and surveillance > Fission
GPX4	MIM	Metabolism > Detoxification > ROS and glutathione metabolism | Metabolism > Detoxification > Selenoproteins
TOMM20L	MOM	Protein import, sorting and homeostasis > Protein import and sorting
COMT	Membrane	Metabolism > Amino acid metabolism > Catechol metabolism
MYG1	Matrix	Mitochondrial central dogma > mtRNA metabolism > mt-rRNA modifications | Mitochondrial central dogma > mtRNA metabolism > mt-mRNA modifications
SPATA20	Matrix	0
OXCT2	Matrix	Metabolism > Carbohydrate metabolism > Ketone metabolism
CCDC127	Membrane	0
CRY1	unknown	0
ACSM2B	Matrix	Metabolism > Lipid metabolism > Fatty acid oxidation
MYO19	MOM	Mitochondrial dynamics and surveillance > Trafficking
MGME1	Matrix	Mitochondrial central dogma > mtDNA maintenance > mtDNA replication | Mitochondrial central dogma > mtDNA maintenance > mtDNA stability and decay
SEPTIN4	MOM	Mitochondrial dynamics and surveillance > Apoptosis
EFHD1	MIM	Signaling > Calcium homeostasis > EF hand proteins
RAB5IF	MIM	OXPHOS > OXPHOS assembly factors | OXPHOS > Respirasome assembly
APEX1	Matrix	Mitochondrial central dogma > mtDNA maintenance > mtDNA repair
SPTLC2	Membrane	Metabolism > Lipid metabolism > Phospholipid metabolism
DMAC1	MIM	OXPHOS > Complex I > CI assembly factors | OXPHOS > OXPHOS assembly factors
ATPSCKMT	MIM	OXPHOS > Complex V > CV assembly factors | OXPHOS > OXPHOS assembly factors
NEU4	MOM	Metabolism > Carbohydrate metabolism
CASP9	IMS	Protein import, sorting and homeostasis > Protein homeostasis > Proteases | Mitochondrial dynamics and surveillance > Apoptosis
AGK	MIM	Protein import, sorting and homeostasis > Protein import and sorting > TIM22 carrier pathway | Metabolism > Lipid metabolism > Phospholipid metabolism
MCL1	MOM	Mitochondrial dynamics and surveillance > Apoptosis
DUS2	Matrix	Mitochondrial central dogma > mtRNA metabolism > mt-tRNA modifications
PLD6	MOM	Metabolism > Lipid metabolism > Cardiolipin synthesis | Mitochondrial dynamics and surveillance > Fusion
TOMM34	MOM	Protein import, sorting and homeostasis > Protein import and sorting > TOM
PRORP	Matrix	Mitochondrial central dogma > mtRNA metabolism > mtRNA granules | Mitochondrial central dogma > mtRNA metabolism > Polycistronic mtRNA processing
PLSCR3	MIM	Metabolism > Lipid metabolism > Cardiolipin synthesis
CKMT1B	MIM	Metabolism > Nucleotide metabolism > Creatine metabolism
NDUFB1	MIM	OXPHOS > Complex I > CI subunits | OXPHOS > OXPHOS subunits
ATP5MF-PTCD1	unknown	0
CASP8	MOM	Protein import, sorting and homeostasis > Protein homeostasis | Mitochondrial dynamics and surveillance > Apoptosis
BCL2L1	MOM	Mitochondrial dynamics and surveillance > Apoptosis
EXD2	Matrix	Mitochondrial central dogma > Translation
ARMC10	MOM	Mitochondrial dynamics and surveillance > Fission | Mitochondrial dynamics and surveillance > Trafficking
MIEF2	MOM	Mitochondrial dynamics and surveillance > Fission
THG1L	Matrix	Mitochondrial central dogma > mtRNA metabolism > mt-tRNA modifications
GOLPH3	IMS	0
PREPL	Matrix	0
FASTKD3	Matrix	Mitochondrial central dogma > mtRNA metabolism > Polycistronic mtRNA processing | Mitochondrial central dogma > mtRNA metabolism > mtRNA stability and decay
CEP89	IMS	OXPHOS > Complex IV > CIV assembly factors | OXPHOS > OXPHOS assembly factors
GPAT2	MOM	Metabolism > Lipid metabolism > Cardiolipin synthesis | Metabolism > Lipid metabolism > Phospholipid metabolism
NBR1	IMS	Mitochondrial dynamics and surveillance > Autophagy
BOK	MOM	Mitochondrial dynamics and surveillance > Apoptosis
FKBP10	IMS	Protein import, sorting and homeostasis > Protein homeostasis > Chaperones
SETD9	Matrix	0
CYP11B1	MIM	Metabolism > Lipid metabolism > Cholesterol, bile acid, steroid synthesis | Metabolism > Metals and cofactors > Heme-containing proteins
CSKMT	Matrix	Signaling
MIGA1	MOM	Mitochondrial dynamics and surveillance > Fusion
RPIA	Matrix	Metabolism > Carbohydrate metabolism
BBC3	MOM	Mitochondrial dynamics and surveillance > Apoptosis
BAD	MOM	Mitochondrial dynamics and surveillance > Apoptosis
BCL2	MOM	Mitochondrial dynamics and surveillance > Apoptosis
BCL2A1	MOM	Mitochondrial dynamics and surveillance > Apoptosis
BCL2L2	MOM	Mitochondrial dynamics and surveillance > Apoptosis
CASP3	IMS	Protein import, sorting and homeostasis > Protein homeostasis > Proteases | Mitochondrial dynamics and surveillance > Apoptosis
DMPK	MOM	0
DNA2	Matrix	Mitochondrial central dogma > mtDNA maintenance > mtDNA replication | Metabolism > Metals and cofactors > Fe-S-containing proteins
MT-ND6	MIM	OXPHOS > Complex I > CI subunits | OXPHOS > OXPHOS subunits
PRKN	MOM	Mitochondrial dynamics and surveillance > Mitophagy | Mitochondrial dynamics and surveillance > Autophagy
ALKBH1	Matrix	Mitochondrial central dogma > mtRNA metabolism > mtRNA granules | Mitochondrial central dogma > mtRNA metabolism > mt-tRNA modifications
PICK1	unknown	0
BCL2L10	MOM	Mitochondrial dynamics and surveillance > Apoptosis
AKAP10	MOM	Signaling > cAMP-PKA signaling
STYXL1	Matrix	Mitochondrial dynamics and surveillance > Apoptosis
NSUN2	Matrix	Mitochondrial central dogma > mtRNA metabolism > mt-tRNA modifications
ADCY10	Membrane	Signaling > cAMP-PKA signaling
SPHK2	MIM	Metabolism > Lipid metabolism > Phospholipid metabolism | Mitochondrial dynamics and surveillance > Apoptosis
NSUN3	Matrix	Mitochondrial central dogma > mtRNA metabolism > mt-tRNA modifications
PABPC5	Matrix	0
PRSS35	unknown	Protein import, sorting and homeostasis > Protein homeostasis
PRIMPOL	Matrix	Mitochondrial central dogma > mtDNA maintenance > mtDNA repair
SERAC1	MOM	Metabolism > Lipid metabolism > Phospholipid metabolism
STX17	MOM	Mitochondrial dynamics and surveillance > Fission | Mitochondrial dynamics and surveillance > Organelle contact sites | Mitochondrial dynamics and surveillance > Autophagy
TRMT61B	Matrix	Mitochondrial central dogma > mtRNA metabolism > mt-tRNA modifications | Mitochondrial central dogma > mtRNA metabolism > mt-rRNA modifications | Mitochondrial central dogma > Translation > Mitochondrial ribosome assembly
PDE2A	MIM	Signaling > cAMP-PKA signaling
PLGRKT	Membrane	0
ETFBKMT	Matrix	Metabolism > Electron carriers > Q-linked reactions, other
RTL10	MOM	Mitochondrial dynamics and surveillance > Apoptosis
BCL2L11	MOM	Mitochondrial dynamics and surveillance > Apoptosis
SPIRE1	MOM	Mitochondrial dynamics and surveillance > Fission | Mitochondrial dynamics and surveillance > Organelle contact sites
C2orf69	Matrix	0
ARMCX2	Membrane	0
ARMCX1	MOM	Mitochondrial dynamics and surveillance > Trafficking
POLB	Matrix	Mitochondrial central dogma > mtDNA maintenance > mtDNA repair
SNAP29	IMS	Mitochondrial dynamics and surveillance > Autophagy
ARMCX3	MOM	Mitochondrial dynamics and surveillance > Trafficking
ARMCX6	Membrane	0
METTL4	Matrix	Mitochondrial central dogma > mtDNA maintenance > mtDNA modifications
SPHKAP	MIM	Signaling > cAMP-PKA signaling
NAT8L	Membrane	Metabolism > Amino acid metabolism > Glutamate metabolism
MCCD1	unknown	0
PIGBOS1	MOM	Mitochondrial dynamics and surveillance > Organelle contact sites
HTD2	Matrix	Metabolism > Lipid metabolism > Type II fatty acid synthesis
RP11_469A15.2	MIM
